# 1 Hallmarks of basidiomycete soft- and white-rot in wood- 2 decay -omics data of *Armillaria*

3  
4  
5  
6

Neha Sahu<sup>1,2</sup>, Zsolt Merényi<sup>1</sup>, Balázs Bálint<sup>1</sup>, Brigitta Kiss<sup>1</sup>, György Sipos<sup>3,4</sup>, Rebecca Owens<sup>5</sup>,  
László G. Nagy<sup>1,6\*</sup>

7  
8  
9

<sup>1</sup> Synthetic and Systems Biology Unit, Biological Research Center, Szeged, 6726 Hungary.

<sup>2</sup> Doctoral School of Biology, Faculty of Science and Informatics, University of Szeged, Szeged,  
6726, Hungary.

<sup>3</sup> Functional Genomics and Bioinformatics Group, Research Center for Forestry and Wood  
Industry, University of Sopron, Sopron 9400, Hungary.

<sup>4</sup> Swiss Federal Research Institute WSL, Zürcherstrasse 111, CH-8903 Birmensdorf,  
Switzerland

<sup>5</sup> Department of Biology, Maynooth University, Kildare W23 F2H6, Ireland.

<sup>6</sup> Department of Plant Anatomy, Institute of Biology, Eötvös Loránd University, Budapest, 1117  
Hungary

17  
18  
19  
20

\* To whom correspondence should be addressed: [lnagy@fungenomelab.com](mailto:lnagy@fungenomelab.com), Synthetic and  
Systems Biology Unit, Biological Research Center, Temesvari krt 62. Szeged, 6726 Hungary.

## 21 Abstract

22 The genus *Armillaria* spp. (Fungi, Basidiomycota) includes devastating pathogens of temperate  
23 forests and saprotrophs that decay wood. Pathogenic and saprotrophic *Armillaria* species can  
24 efficiently colonize and decay woody substrates, however, mechanisms of wood penetration  
25 and colonization are poorly known. We assayed the colonization and decay of autoclaved  
26 spruce roots using the conifer-specialists *Armillaria ostoyae* and *A. cepistipes* using  
27 transcriptomic and proteomic data. Transcript and protein levels were altered more extensively  
28 in the saprotrophic *A. cepistipes* than in the pathogenic *A. ostoyae* and in invasive mycelia of  
29 both species compared to their rhizomorphs. Diverse suites of carbohydrate-active enzyme  
30 genes (CAZymes), in particular pectinolytic ones and expansins, were upregulated in both  
31 species, whereas ligninolytic genes were mostly downregulated. Our gene expression data,  
32 together with previous comparative genomic and decay-chemistry analyses suggest that wood  
33 decay by *Armillaria* differs from that of typical white-rot fungi and shows features resembling soft  
34 rot. We propose that *Armillaria* species have modified the ancestral white-rot machinery so that  
35 it allows for selective ligninolysis based on environmental conditions and/or host types.

36

## 37 Introduction

38 *Armillaria* spp. (Agaricales, Fungi) are among the most devastating fungal pathogens in woody  
39 ecosystems, including temperate forests, tree plantations, vineyards, and gardens [1–3] and are  
40 known to cause tremendous losses to the economy, health, and long-term productivity of forests  
41 [4–10]. The genus *Armillaria* is classified as white-rot fungi and comprises about 70 known  
42 species [11] including both pathogens and saprotrophs, making them suitable for studying  
43 mechanisms of pathogenicity and wood-decay systems in fungi [4, 8, 10–12].

44 *Armillaria* spp. can live both as plant necrotrophs and as saprotrophs [4, 10, 12, 13].  
45 Based on their gene complement, they may decompose all components of wood, including the  
46 recalcitrant lignin [11–16] and other aromatic polyphenols along with cellulose, hemicellulose,  
47 and pectin [11, 12, 15, 16]. White rot fungi remove lignin from wood using high-redox potential  
48 oxidoreductases (e.g. class-II peroxidases [17–20]) and degrade complex polysaccharide  
49 polymers using diverse glycosyl hydrolase (GH), auxiliary activity (AA), carbohydrate esterase  
50 (CE) and polysaccharide lyase (PL) cocktails [20–23]. Decay-associated gene expression has  
51 been assayed in several species, mostly in the Polyporales (e.g. *Phanerochaete* spp. [24–28],  
52 *Ceriporiopsis subvermispora* [29], *Rigidoporus microsporus* [30, 31]) and to a lesser extent in  
53 other clades (*Heterobasidion* spp. [32–34], *Moniliophthora perniciosa* [35]). These studies  
54 highlighted wood species-specific responses, sequential activation of degradative enzymes,  
55 along with lifestyle-driven differences among species.

56 Previous comparative genomic studies on *Armillaria* have highlighted plant cell wall  
57 degrading enzyme repertoires reminiscent of white-rot fungi [11, 12, 15, 16], with a  
58 characteristic enrichment of pectinolytic genes [12, 16]. Accordingly, recent studies treated  
59 *Armillaria* spp. as white-rot based on the presence of lignocellulose degrading enzymes found in  
60 their genomes [11, 12, 16, 36, 37]. However, previous studies have also shown that *Armillaria*  
61 species primarily decay the cellulose, hemicellulose, and pectin components of the plant cell  
62 wall, and leave lignin unattacked during early stages of decay [38, 39]. Chemical and  
63 microscopic analyses of wood decay by *Armillaria* produced contradictory results. *A. mellea* was  
64 classified as a Group II white-rot fungi where celluloses and pentosans are decayed at early  
65 stages and lignin remains unaffected [39] resembling a possible brown-rot like approach.  
66 However, brown-rot is marked by an increased alkali-solubility in the wood aiding the fungi in  
67 the dissolution of plant cell wall carbohydrates, which was not found for *A. mellea* [39]. On the  
68 other hand, Schwarze et al reported a type-I soft-rot decay where the fungal hyphae grow  
69 through the secondary cell wall layer, producing characteristic cavities in the tracheids, axial and  
70 xylem ray parenchyma cells of Scots pine by *A. borealis*, *A. cepistipes*, *A. gallica*, *A. ostoyae* and  
71 *A. mellea* [38]. Soft-rot fungi by definition are now restricted to Ascomycota [14, 40–42], yet,  
72 there are many Agaricomycetes species that produce symptoms resembling soft rot or that did  
73 not fit the traditional white rot/brown rot dichotomy [36, 43, 44]. There are also reports  
74 suggesting a soft rot decay pattern in *Cylindrobasidium* spp [36] a close relative of *Armillaria*  
75 that also has a lower number of lignin-degrading enzymes as compared to typical white-rot  
76 decayers [12, 36, 45]. In order to place the *Armillaria* species into the ever-growing array of  
77 decay types, it is important to decode wood decay patterns in *Armillaria*.

78 In general, pathogenic basidiomycetes spread the infection by means of basidiospores.  
79 *Armillaria* spp. show another effective dispersal mechanism, through shoestring-like structures

80 known as the rhizomorphs [4, 11]. Rhizomorphs are aggregations of hyphae exhibiting polarized  
81 apical growth, covered by a gelatinous sheath as their outermost layer. They serve as migratory  
82 or exploratory organs across larger distances beneath the soil [46–54]. It has also been  
83 speculated in previous studies that rhizomorphs might be responsible for foraging for nutrients  
84 [12, 46, 48] and for infecting plants via direct root contact [4, 9, 47, 55–57]. Rhizomorphs might  
85 also help *Armillaria* species become some of the largest and oldest organisms on Earth [58, 59].  
86 At late stages of host colonization, rhizomorphs are often observed as thick, melanized cords on  
87 decayed and decorticated wood, however, their exact role in colonizing or degrading wood is  
88 poorly known.

89 We here employed a multi-omics approach to understanding wood-decay by *A. ostoyae*  
90 and *A. cepistipes*, both of which preferentially colonize conifers [13], the former as a pathogen  
91 while the latter as a saprotroph with a mortality ratio not exceeding 5%, mostly in  
92 non-healthy trees [13, 60]. We allowed the two species to colonize sterilized Norway spruce  
93 roots (Fig 1A, B), then performed RNA-Seq and proteomics on invasive tissues (mycelium and  
94 rhizomorphs) and their non-invasive counterparts (*i.e.* mycelium and rhizomorphs grown in the  
95 absence of wood). Both species deployed a wide array of lignocellulose-degrading enzymes  
96 during root colonization, but the saprotroph *A. cepistipes* showed a stronger response to wood  
97 than did *A. ostoyae*. When compared with their non-invasive counterparts, invasive mycelia of  
98 both species harbored many more upregulated genes, including glycoside hydrolases, pectin-  
99 binding modules, carbohydrate-binding modules, hydrophobins, cytochrome P450s, and  
100 transcription factors than invasive rhizomorphs. We observed a decay pattern unusual for white-  
101 rot fungi, with weaker induction of lignin-targeting enzymes and upregulation of iron acquisition  
102 genes pointing towards a non-canonical white-rot strategy. Altogether our results shed light on  
103 soft rot and white rot wood-decay strategies in pathogenic and saprotrophic *Armillaria* species.  
104

## 105 Results and Discussion

### 106 Morphological observations and type of samples

107 Sterilized Norway spruce roots were introduced to one-week-old cultures of *A. ostoyae* and *A.*  
108 *cepistipes* and incubated at 25°C in the dark for 3-4 weeks until the roots were colonized. We  
109 observed an abundant growth of the mycelium in and under the bark layer (Fig 1B). Although  
110 previous studies suggested that colonization happens via direct rhizomorph contact and  
111 penetration [4, 9, 11, 12, 47, 55–57], we did not find evidence for the mechanical entry of  
112 rhizomorphs into the wood. Instead, upon coming in contact with the root, rhizomorphs switch to  
113 hyphal growth and spread further as mycelium (Fig S1-C). Rhizomorphs were not observed  
114 below the bark in *A. ostoyae* even after 8 weeks of incubation whereas *A. cepistipes* grew  
115 rhizomorph-like structures below the bark layer (Fig S1-B). Both species exited the root section  
116 as rhizomorphs emerging out of the piece of wood. These observations suggest that mycelium  
117 is the primary colonizing structure of wood, which is consistent with the higher surface/volume  
118 ratio of hyphae being better suited for nutrient acquisition as compared to rhizomorphs.  
119 Rhizomorphs probably emerge much later, possibly to transfer nutrients, as seen commonly  
120 under the bark of decayed logs [4].

121  
122

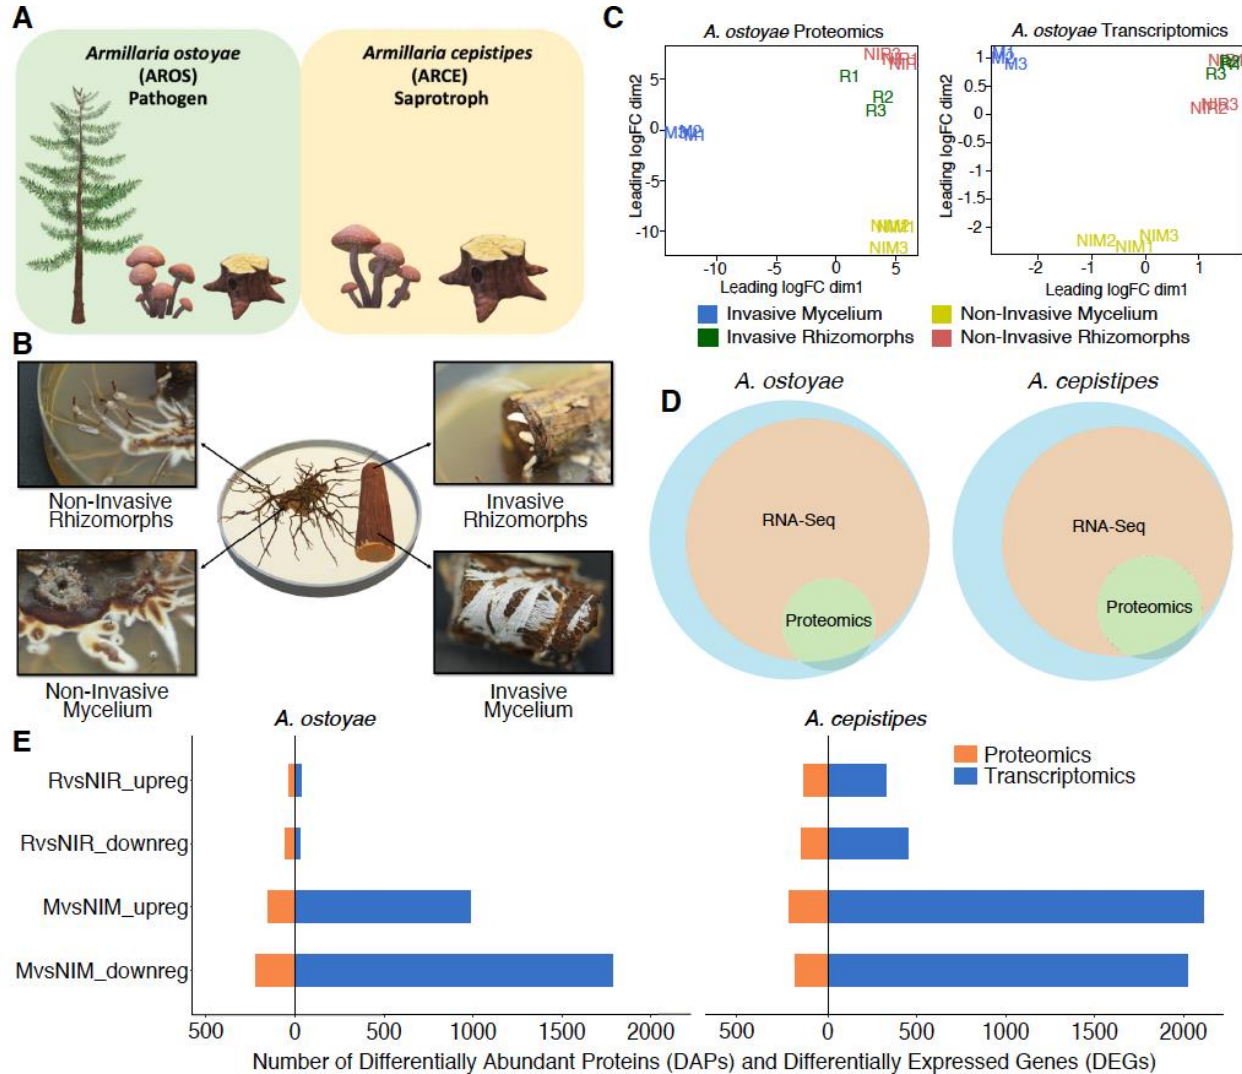

123  
124

125 Fig 1. Overview of the experimental approach for root decay studies. A) Representation of  
126 *Armillaria ostoyae* (pathogenic) and *A. cepistipes* (saprotroph) used in this study, B) The four  
127 tissue types sampled for transcriptomics and proteomics analysis viz. invasive mycelium  
128 (growing beneath the outer layer of root), invasive rhizomorphs (emerging out of the roots), non-  
129 invasive mycelium and non-invasive rhizomorphs (growing in absence of root), C)  
130 Multidimensional scaling of three biological replicates from each of the tissue types in *A.*  
131 *ostoyae* for proteomics (left) and transcriptomics (right), D) Proportion of transcripts and proteins  
132 detected in the two -omics analysis. The blue circle represents the whole proteome, orange  
133 depicts the transcripts detected in the RNASeq, and green represents the proteins detected in  
134 the proteomics analyses. E) The number of differentially expressed genes (blue) and  
135 differentially abundant proteins (orange) detected in the two species.

## 136 Overview of new -omics data

137 We analyzed four tissue types from both species in three biological replicates using  
138 transcriptomics and proteomics (Fig 1B). The mycelium and rhizomorphs collected from  
139 colonized roots are hereafter referred to as invasive mycelium (M) and invasive rhizomorphs  
140 (R), while those grown in the absence of roots are referred to as non-invasive mycelium (NIM)  
141 and non-invasive rhizomorphs (NIR), respectively. This yielded 12 samples for both *A. ostoyae*  
142 and *A. cepistipes* (with an additional sample type in the latter, see Fig S1-B). We prepared  
143 ribosomal RNA-depleted RNA libraries and sequenced them to a depth of 46.7-93.4 million  
144 paired-end reads on the Illumina NextSeq 500 platform. On average, 69% and ca. 38% of the  
145 reads mapped to the transcripts in *A. ostoyae* and *A. cepistipes*, respectively (Table S1).  
146 Concerning the low mapping percentages in *A. cepistipes*, we find that they were either caused  
147 by genomic DNA contamination or a poor annotation of the reference species (~50% of  
148 unmapped reads mapped to intergenic regions, and not transcripts). Although such factors can  
149 dampen the signal of differential expression, we find that in our case this did not significantly  
150 compromise our analysis of differential gene expression (see the clear separation of samples in  
151 the MDS and the high number of DEGs, Fig 1C, E).

152 Label-free comparative proteomics provided relative abundance of data across the  
153 different sample types. A total of 37,879 and 36,087 peptides were identified from *A. ostoyae*  
154 and *A. cepistipes*, respectively, which were subsequently rolled up into protein groups, with  
155 median protein sequence coverage ranging from 30.1 – 34%.

156 Multidimensional scaling (MDS) plots show a strong clustering of the biological replicates  
157 in both transcriptomic and proteomic data in both species. The MDS plots portray a clear  
158 separation of the invasive and non-invasive mycelium samples whereas the invasive  
159 rhizomorphs and non-invasive rhizomorphs showed higher similarity to each other (Fig 1C for *A.*  
160 *ostoyae*, Fig S1 for *A. cepistipes*) suggesting that the larger difference exists between invasive  
161 and non-invasive mycelium. For *A. ostoyae*, RNA-Seq detected and quantified 17,198  
162 transcripts, while the label-free proteomics analysis detected 3,177 proteins. In *A. cepistipes* we  
163 obtained data for 15,861 transcripts and 3,232 proteins (Fig 1D). Overlap between the two -  
164 omics datasets was substantial about 99.8% of the detected proteins to be also present in the  
165 RNA-Seq data (Fig 1D). At the same time, there was a limited correlation between the fold-  
166 change values acquired for transcripts and proteins (Fig S2), which is not unusual among  
167 proteomic and transcriptomic datasets.

168 Expression analyses were carried out to identify differentially expressed genes (DEGs).  
169 In *A. ostoyae* we found 987 and 35 upregulated genes ( $\log_2FC > 1$ ,  $p\text{-value} < 0.05$ ) in invasive vs.  
170 non-invasive mycelium (M vs NIM) and in invasive vs. non-invasive rhizomorphs (R vs NIR)  
171 (5.74% and 0.2% of transcriptome), respectively. Considerably more, 2,108 and 327  
172 upregulated genes were found to be differentially expressed in M vs NIM and R vs NIR in *A.*  
173 *cepistipes*, respectively (13.29% and 2.06% of transcriptome; Table S2).

174 The number of differentially abundant proteins (DAPs) in the proteomics analysis was  
175 lower: we detected 279 and 108 proteins with increased abundance in M vs NIM and R vs NIR in  
176 *A. ostoyae* (8.78 and 3.40 % of detected proteome), and 439 and 282 proteins with increased  
177 abundance in M vs NIM and R vs NIR, respectively in *A. cepistipes* (13.58 and 8.73 % of detected  
178 proteome; Table S3).

179 We found considerably more DEGs/DAPs in the mycelium than in rhizomorphs (Fig 1E)  
180 in both species, which probably indicates that the mycelium is more actively involved in the  
181 colonization of woody tissues than are rhizomorphs. This is consistent with the morphological  
182 observations and an invasion of the roots primarily by individual hyphae. A more surprising  
183 observation is that the saprotrophic *A. cepistipes* shows a higher number of DEGs/DAPs than  
184 the pathogenic *A. ostoyae* (Fig 1E). To confirm that this is not a result of higher baseline  
185 expression of some genes in *A. ostoyae*, we compared the distribution of raw expression values  
186 of co-orthologs in the M and NIM samples in both species (Fig S3). This showed that baseline  
187 expression of genes in non-invasive mycelia of *A. ostoyae* was not higher than that in *A.*  
188 *cepistipes*, indicating that the higher number of DEGs in *A. cepistipes* is indeed the result of the  
189 stronger reaction of this species to wood. We speculate that this is because saprotrophs, to gain  
190 a competitive advantage over other microbes, have to colonize/degrade wood faster than  
191 necrotrophic pathogens, such as *A. ostoyae*, which can both feed on living parts of the tree and,  
192 upon killing the host, can be the first colonizers of the wood [12, 61].

### 193 Gene ontology (GO) analyses

194 In the transcriptomics data for *A. ostoyae*, we found 25 and 11 GO terms significantly enriched  
195 among the genes upregulated in MvsNIM and RvsNIR, respectively (Fig 2, left). For *A.*  
196 *cepistipes* we found 57 and 29 terms enriched in MvsNIM and RvsNIR, respectively (Fig S4,  
197 left). In both species, genes upregulated in invasive mycelia were enriched ( $p < 0.05$ , Fisher's  
198 exact test) for terms related to oxidation-reduction, lipid metabolism, transmembrane transport,  
199 iron ion and heme-binding processes along with the terms 'fungal type cell wall' and 'structural  
200 constituent of cell wall'. We find that the enrichment of iron-binding related terms was driven by  
201 the upregulation of members of the high-affinity iron permease complex (2 out of 3 genes and, 1  
202 out of 2 genes upregulated in *A. ostoyae* and *A. cepistipes*, respectively, see below). Consistent  
203 with the lower number of DEGs in invasive vs non-invasive rhizomorphs, we observed fewer  
204 enriched GO terms (see Table S4).

205 We observed a similar pattern in the proteomic data, there were more enriched GO  
206 terms in *A. cepistipes* than *A. ostoyae*. In *A. ostoyae*, we found 18 and 12 significantly enriched  
207 terms in mycelium vs non-invasive mycelium and rhizomorphs vs non-invasive rhizomorphs,  
208 respectively (Fig 2 right), whereas, in *A. cepistipes*, there were 35 significantly enriched terms in  
209 mycelium vs non-invasive mycelium and 19 in rhizomorphs vs non-invasive rhizomorphs (Fig  
210 S4, right). Terms enriched in mycelium vs non-invasive mycelium included pectinesterase  
211 activity, polygalacturonase activity, cellulose-binding, carbohydrate-binding, hydrolase activity,  
212 together with cell wall modification, cell wall-related terms, sugar metabolic processes.

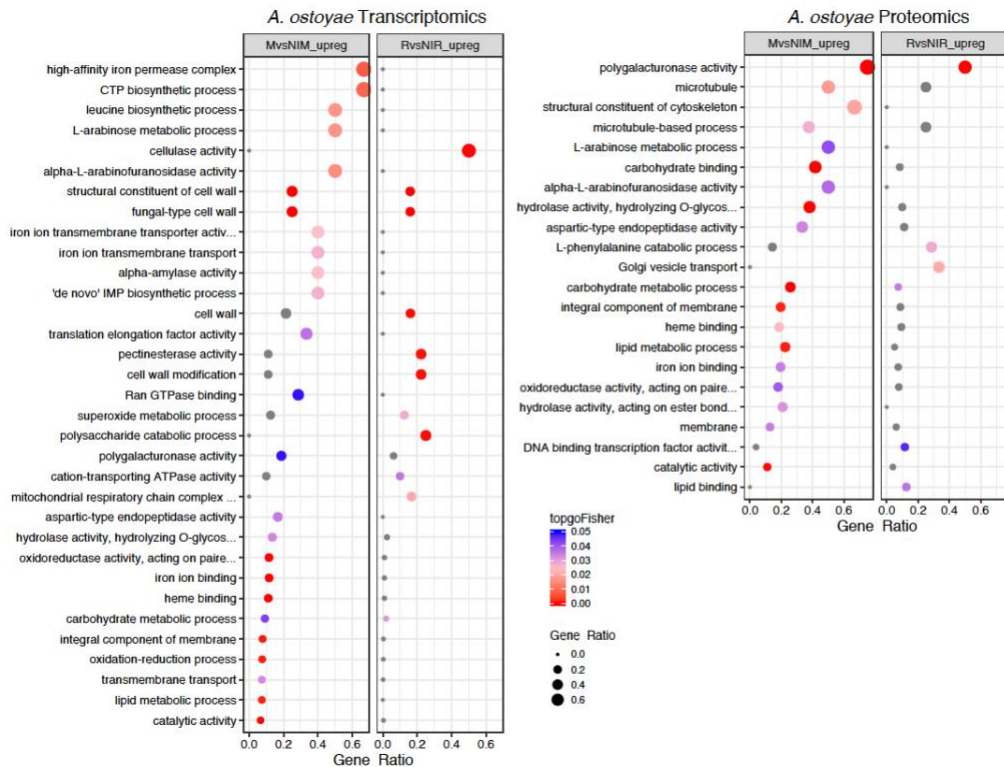

213  
 214 Fig 2. Enriched GO terms in MvsNIM and RvsNIR of *A. ostoyae* for transcriptomics (left) and  
 215 proteomics (right). The ratio of number of a particular GO term in a specific comparison  
 216 (mycelium vs non-invasive mycelium or in rhizomorphs vs non-invasive rhizomorphs) to the total  
 217 number of that GO term for a species was used to plot gene ratios for enriched GO terms  
 218 ( $p < 0.05$ , Fisher's exact test). The size of the dot is directly proportional to gene ratio, and the  
 219 color of the dots corresponds to p-values. Grey dots represent GO terms, enriched in only one  
 220 of the comparisons *i.e.* either mycelium vs non-invasive mycelium or rhizomorphs vs non-  
 221 invasive rhizomorphs. Enriched GO terms in MvsNIM and RvsNIR of *A. cepistipes* can be found  
 222 in Fig S2.

## 223 Global transcriptome and proteome similarity

224 We measured global similarity among transcriptomes and proteomes within and across species  
 225 based on Pearson correlation. In general, we observed a better correlation among  
 226 transcriptomes than among proteomes (Fig 3).

227 Within species, we observed limited differences among transcriptomes, with the highest  
 228 global transcriptome similarity values observed between invasive tissue types (Fig 3A). For  
 229 example, in *A. ostoyae*, the two most similar sample types were invasive mycelium and invasive  
 230 rhizomorphs (mean Pearson: 0.92), slightly higher than other combinations of samples (0.83 -  
 231 0.88). A similar, but a stronger pattern is observable in *A. cepistipes* (Fig 3A). This pattern  
 232 suggests that contact with wood elicits similar expression changes irrespective of the tissue  
 233 type. In support of this, we could identify 4 and 127 genes upregulated in the invasive mycelium  
 234 and invasive rhizomorphs of *A. ostoyae* and *A. cepistipes*, respectively. Many of these genes

235 were annotated as hydrophobins, cytochrome P450s, galactose-binding domain-like proteins,  
 236 and a number of CAZymes (Table S2).

237 The among-species similarity between sampled tissues was assessed based on 11,630  
 238 co-orthologous genes in *A. ostoyae* and *A. cepistipes*, identified by OrthoFinder [62], out of  
 239 which transcriptomic and proteomic data cover 10,675 and 2,404, co-orthologs, respectively. A  
 240 surprisingly high correlation was found between the invasive mycelia of *A. ostoyae* and *A.*  
 241 *cepistipes* (Fig S5), whereas the correlation was comparatively lower in all other combinations.  
 242 This observation was similar for both transcriptomic and proteomic data and was even more  
 243 pronounced when we considered only genes/proteins that were DEG or DAP in at least one of  
 244 the species (Fig 3B). We interpret the correlated gene expression in *A. ostoyae* and *A.*  
 245 *cepistipes* as an indication of a shared response of invasive mycelia to the presence of spruce  
 246 roots.  
 247

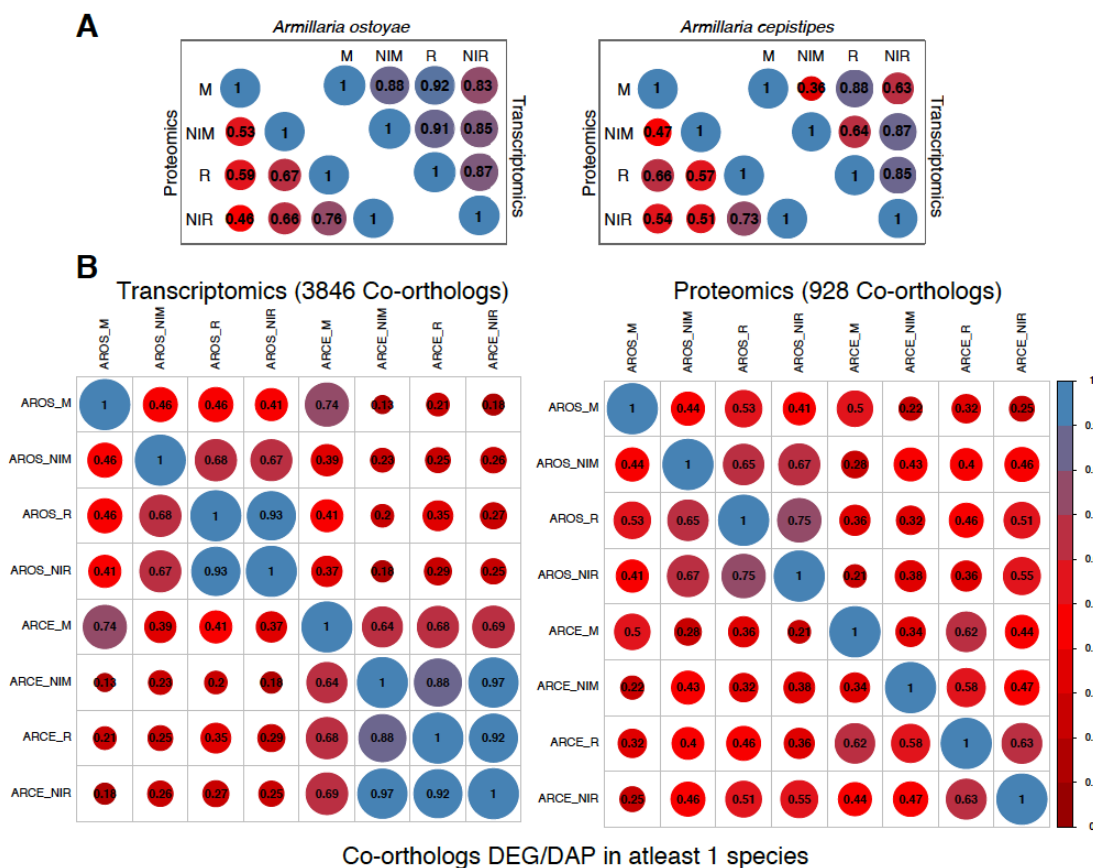

248  
 249 Fig 3. Global transcriptome/proteome similarity between *A. ostoyae* and *A. cepistipes*. A)  
 250 Correlation between the 4 tissue types for proteomics and transcriptomics data in *A. ostoyae*  
 251 (*left*) and *A. cepistipes* (*right*). B) Correlation between co-orthologs which were significantly  
 252 differentially expressed/abundant in at least one of the species (for all co-orthologs, see Fig S3),  
 253 showing correlation between samples across the two species. Blue represents higher  
 254 correlation and red represents lower. Size of the circle is directly proportional to higher  
 255 correlation. Pairwise mean Pearson correlation coefficients are given as numbers in the circles.



## 256 Shared transcriptomic response of mycelia to wood

257 To understand what comprises the observed similarity in wood decay, we focused on co-  
258 orthologous gene/protein pairs up- or downregulated in invasive mycelia of both species. We  
259 found 779 co-orthologs having similar differential expression in the invasive mycelium. Of these  
260 372 and 407 were significantly up- and downregulated, respectively (Fig 4B, Table S5). For the  
261 372 upregulated co-orthologs, we observed overall higher fold changes and expression levels in  
262 *A. cepistipes* than in *A. ostoyae* (Fig 4B), again, underscoring a stronger response of *A.*  
263 *cepistipes* to wood.

264 Among the most upregulated co-orthologs in the transcriptomic analyses, we found  
265 oxoglutarate/iron-dependent dioxygenases, proteins of the galactose-binding-like domain  
266 superfamily (including CBM67, see below), ricin-B lectins, hydrophobins, intradiol-ring cleavage  
267 dioxygenases, GMC oxidoreductases, cytochrome p450-s, as well as 10 conserved  
268 transcription factors and several unannotated genes (Fig 4B, Table S5). The most highly  
269 induced genes in both species were oxoglutarate/iron-dependent dioxygenases. These were  
270 reported to be responsible for the oxidation of organic substrates, mycotoxin production, and  
271 secondary metabolite biosynthesis [63–65] and were also found to be upregulated in both white-  
272 rot and brown-rot wood decay studies [66–68]. We found 46 oxoglutarate/iron-dependent  
273 dioxygenase genes in both species, of which 5 and 9 were upregulated in the invasive mycelium  
274 of *A. ostoyae* and *A. cepistipes*, respectively (but not in invasive rhizomorphs). In proteomics,  
275 we found 1 and 4 genes in the invasive mycelium and 1 and 2 genes in the invasive  
276 rhizomorphs with increased abundance in *A. ostoyae* and *A. cepistipes*, respectively. The 2-  
277 oxoglutarate dioxygenase superfamily is widespread across microorganisms, fungi, plants, and  
278 mammals as well [65, 69–71], however, their versatile nature makes them difficult to interpret in  
279 terms of exact biological relevance in wood decay mechanisms.

280 In the proteomics data, we found 89 co-orthologs with increased and 45 with decreased  
281 abundance in both species (Fig 4C, Table S5), of which, the ones with the highest abundance in  
282 both species included GH31, GH3, GH88, GH92 CAZyme families as well as aspartic  
283 peptidases, fungal lipases and Kre9/Knh1 fungal cell wall-related proteins. Some of these  
284 proteins were only detectable in the invasive mycelium and not in non-invasive mycelia,  
285 including several CAZymes such as pectin lyases, GH28, carbohydrate-binding modules  
286 (CBMs), PL8, GH3, GH35, galactosidases, carboxylesterases and several other gene families  
287 like GMC oxidoreductases, various transporters, cytochrome P450s.

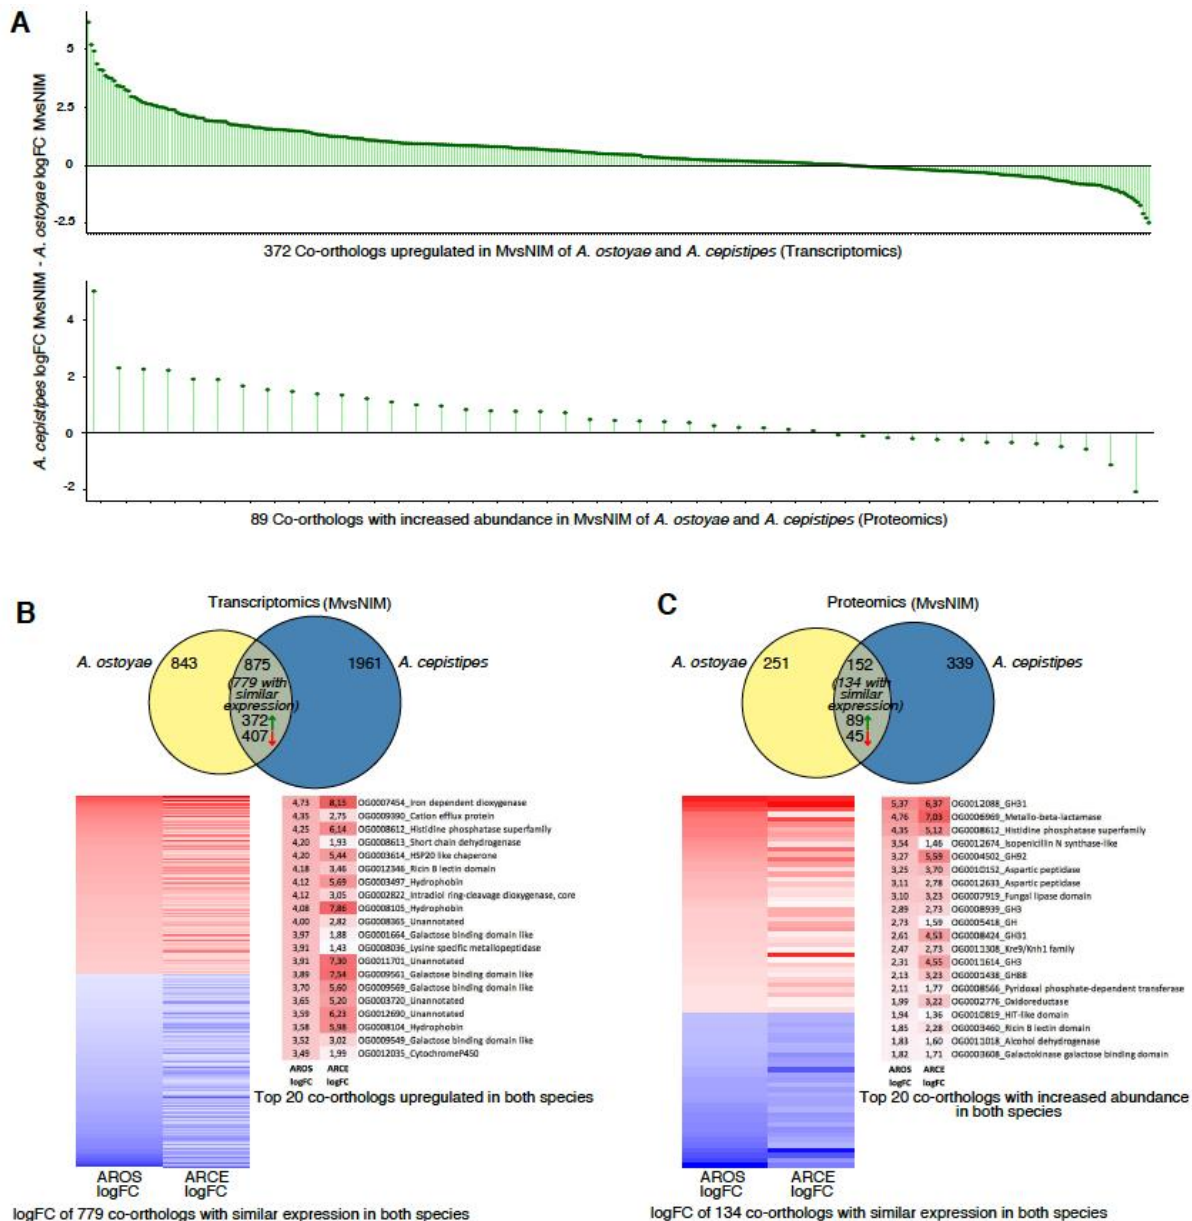

288  
 289 Fig 4. Response towards spruce roots by the mycelia (MvsNIM) of *A. ostoyae* and *A. cepistipes*.  
 290 A) logFC differences of co-orthologs DEG (up) and DAP (down) in both species, For  
 291 proteomics, only genes for which a fold change could be calculated are shown (43 out of 89  
 292 orthologs). B) Venn diagram showing species-specific and common DEGs in *A. ostoyae* and *A.*  
 293 *cepistipes*. Heatmap below showing 779 co-orthologs with similar expression patterns  
 294 (upregulated/downregulated in both species) out of the 875 common DEGs. Towards right are  
 295 the top 20 upregulated proteins (red) in the two species. C) Venn diagram showing species-  
 296 specific and common DAPs in *A. ostoyae* and *A. cepistipes*. Heatmap below showing 134 co-  
 297 orthologs with similar abundance (increased/decreased in both species) out of the 152 common  
 298 DAPs Towards right are the top 20 proteins with increased abundance in the two species.

## 299 Characteristic PCWDE expression in invasive mycelia

300 A diverse array of plant cell wall degrading enzymes (PCWDEs) were found to be differentially  
301 expressed in the invasive tissues of both species. Overall the number of upregulated PCWDEs  
302 in the invasive mycelium was much higher than the invasive rhizomorphs when compared to  
303 their non-invasive counterparts (Fig 5). The saprotrophic *A. cepistipes* had a higher number of  
304 DEG/DAP PCWDEs than the pathogenic *A. ostoyae* (Table S6, Fig 5). Among differentially  
305 expressed PCWDEs in mycelium vs non-invasive mycelium, upregulated pectinases were most  
306 numerous accounting for 17% and 37% of all pectinases in *A. ostoyae* and *A. cepistipes*,  
307 respectively. These were followed by cellulases (9%, 27%), hemicellulases (11%, 30%), and  
308 expansins (12%, 10%) (Fig 5, see Table S6 for the complete list of differentially expressed  
309 PCWDEs). We found most of the lignin-degradation related genes to be downregulated in both  
310 species, with none upregulated in *A. ostoyae* and few upregulated ones in *A. cepistipes* (Fig. 5).  
311 We found 1 and 8 upregulated LPMOs/GH61 in invasive mycelia of *A. ostoyae* and *A.*  
312 *cepistipes*, respectively, which might act together with the cellobiohydrolases to enhance  
313 cellulose degradation [72–77].

314 Our analyses revealed significant expression of both pectinolytic PCWDEs and  
315 expansins (Fig 5, Table S6), indicating hallmarks of early-stage wood decay. In previous time-  
316 series studies, abundant pectinase expression was found during the early stages of wood-  
317 decay, suggesting a requirement of early-stage pectinolytic ‘pretreatment’ [78, 79] for making  
318 the plant cell wall structure accessible, followed by a wave of non-pectinolytic GHs expression.  
319 In previous studies [78], it was also observed that early stages of wood decay were marked by  
320 increased expression of expansins and GH28 pectinases, suggesting both enzymatic and  
321 mechanical loosening of the plant cell walls for easier access of the cellulose and hemicellulose  
322 components. Our observations of pectinolytic PCWDE and expansin expression are in line with  
323 this.

324 In contrast, we detected few lignin-degrading AAs to be DEG/DAP in the two species,  
325 the majority of which were downregulated, suggesting that lignin was not appreciably attacked  
326 by *Armillaria* in our experiments. Of the 39 genes that encode lignin degradation related proteins  
327 (Table S6) in each of the species, we found no upregulated and about 15% downregulated  
328 ligninases in *A. ostoyae*. In *A. cepistipes*, we found 15% upregulated and 30% downregulated  
329 ligninases. In the *A. cepistipes*, the proteomic data revealed somewhat more substantial lignin  
330 degradation: we found 4 (out of 11 detected) AA1\_1 laccases, 3 AA2 peroxidases (out of 4) and  
331 7 (aryl) alcohol dehydrogenases (AA3\_2, of 17) increased in invasive relative to non-invasive  
332 mycelium. The modest induction and general downregulation (in the transcriptomic data) of  
333 ligninolytic genes are remarkable for white-rot fungi, especially in the light of previous studies  
334 reporting an early activation of ligninolytic enzymes by white-rot fungi [79, 80] and the  
335 enrichment of class II peroxidases and other AAs (e.g. laccases) near the hyphal front. The lack  
336 of a ligninolytic burst is, on the other hand, consistent with the underrepresentation of ligninolytic  
337 gene families in *Armillaria* compared to other white-rot Agaricales [12]. We note that heat-based  
338 lignin breakdown or loosening of the lignocellulose matrix during autoclaving [81–83] may  
339 provide a complimentary, although a less likely explanation of our data.

340

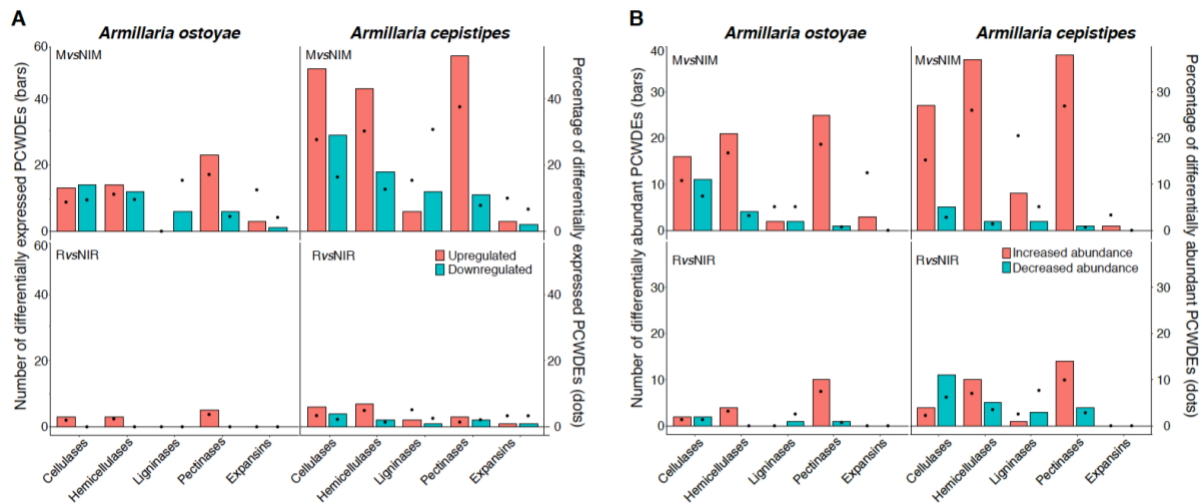

341  
 342 Fig 5. Differentially expressed/abundant plant cell wall degrading enzymes in the two species.  
 343 A) Barplot showing number, and dots showing the percentage of differentially expressed  
 344 PCWDEs in the two species in MvsNIM (top) and RvsNIR (bottom) in transcriptomics data. B)  
 345 Barplot showing the number, and dots showing the percentage of differentially abundant  
 346 PCWDEs in the two species in MvsNIM (top) and RvsNIR (bottom) in proteomics data.  
 347 CAZymes classified on the basis of their substrate in the plant cell wall (Table S6) showing the  
 348 number of genes upregulated/increased abundance (orange) and downregulated/decrease  
 349 (blue-green) in the two species.

### 350 Evidence for pectinolysis from galactose binding domain proteins

351 We found a high number of galactose-binding-like domain superfamily protein (GBDPs) genes  
 352 upregulated the two species, especially in invasive mycelia. This protein superfamily includes,  
 353 among others, the rhamnose-binding module family CBM67. Out of 84 and 89 genes containing  
 354 GBDPs in *A. ostoyae* and *A. cepistipes*, we found 13 and 29 upregulated in invasive vs non-  
 355 invasive mycelia, respectively. Four of these genes were also among the 20 most highly  
 356 induced co-orthologous genes in invasive mycelia (see Fig 4). In the proteomics data, *A.*  
 357 *ostoyae* had 7 GBDPs (2 CBM67s) and *A. cepistipes* had 12 GBDPs (2 CBM67s) with  
 358 increased abundance in the mycelium vs non-invasive mycelium. A significant portion (35-50%)  
 359 of upregulated genes were annotated as CBM67s in the CAZy database [84]. CBM67 are L-  
 360 rhamnose binding modules, which are reported to be involved in pectin degradation [12, 85].  
 361 Apart from CBM67, there were a number of other pectinolytic enzymes (e.g. GH78, PL4)  
 362 associated with these GBDPs, which were upregulated in the two species (Table S6). The  
 363 abundance of L-rhamnose binding modules on their own, or in combination with pectinolytic  
 364 enzyme encoding genes, as well as the dominance of pectinolytic PCWDEs among upregulated  
 365 CAZymes could suggest a decay strategy focussed on pectin removal for accessing the  
 366 cellulose and hemicellulose units of the plant cell wall.

### 367 Iron acquisition genes upregulated in *Armillaria* spp.

368 We observed a number of iron acquisition genes to be upregulated in mycelia vs non-invasive  
 369 mycelia of both species. Uptake of extracellular ferrous iron (Fe<sup>2+</sup>) occurs in fungi via a two-part

370 transporter, which consists of an iron permease (Ftr1/FtrA) and an associated multicopper  
371 oxidase (Fet3) [86]. In *A. ostoyae* there were 3 Ftr1/Fip1/EfeU iron permease genes  
372 (IPR004923) of which 2 were upregulated in the mycelium. Of these 3 iron permeases, two  
373 were accompanied by a multicopper oxidase gene (one had an upstream and the other had a  
374 downstream MCO to the Ftr1/FtrA iron permease respectively). In *A. cepistipes*, there were 2  
375 iron permease genes, of which one was upregulated in mycelium vs non-invasive mycelium.  
376 The genes downstream to these 2 iron permeases were multicopper oxidases, and both were  
377 upregulated in mycelium vs non-invasive mycelium. Neither iron permeases nor the Fet3-  
378 multicopper oxidases were differentially expressed in rhizomorphs vs non-invasive rhizomorphs.  
379 In proteomics, we found 1 Ftr1/FtrA iron permease gene with increased abundance in mycelia  
380 of both *A. ostoyae* and *A. cepistipes*. There was 1 downstream multicopper oxidase gene with  
381 increased abundance in the mycelium only of *A. cepistipes* and not in *A. ostoyae*. The iron  
382 permease system along with iron reductases and MCOs is specifically seen upregulated in  
383 brown-rot wood decay [67, 78, 85, 87–89].

#### 384 Diverse cytochrome P450s are differentially expressed in invasive tissues

385 Cytochrome P450s have diverse functions across the fungal kingdom, including secondary  
386 metabolite production, detoxification, aromatic compound degradation, among others [90].  
387 Based on InterPro domains (IPR001128) we found a total of 264 and 307 cytochrome P450  
388 encoding genes in *A. ostoyae* and *A. cepistipes*, respectively. Of these 35 were upregulated and  
389 57 downregulated in invasive mycelia along with 3 upregulated 1 downregulated in rhizomorphs  
390 of *A. ostoyae* relative to the non-invasive counterparts of these tissues. In proteomics data for *A.*  
391 *ostoyae*, we found 7 increased and 7 decreased cytP450s in MvsNIM, along with 3 increased  
392 and no proteins with decreased abundance in RvsNIR. In *A. cepistipes* we found 58  
393 (proteomics: 13) up- and 84 (6) downregulated cytP450s in MvsNIM along with 27 (11) up- and  
394 22 (7) downregulated cytP450s in RvsNIR. Most of the cytochrome P450s with increased  
395 abundance in invasive mycelia compared to non-invasive were classified as E-class group 1.

396 Interestingly, among the cytochrome P450 proteins that had decreased abundance in  
397 invasive mycelia were co-orthologs of the Psi-producing oxygenase A (*PpoA*) from *Aspergillus*  
398 *nidulans*, which is associated with secondary metabolite biosynthesis (sterigmatocystin),  
399 oxylipin biosynthesis and coordination of a/sexual sporulation [91]. Ppo proteins are also  
400 implicated in virulence, with *A. fumigatus ppo* mutants displaying hypervirulence, possibly due to  
401 the activation of the immune response in mammals [92]. This is observed plant pathogens also,  
402 with *Fusarium verticillioides ppo* deletion strain showing higher virulence in assays with maize  
403 cobs as well as elevated fumonisin production and lower induction of plant defense-related  
404 genes [93]. Therefore, the downregulation of *PpoA* homologs in invasive mycelia of *A. ostoyae*  
405 and *A. cepistipes* may result in lower induction of plant defenses, alteration of secondary  
406 metabolism, and enhanced virulence.

#### 407 Rhizomorphs show an upregulation of transporters as compared to 408 mycelium

409 *Armillaria* rhizomorphs are putatively involved in the translocation of nutrients [94]. Rhizomorphs  
410 are generally believed to serve as migratory organs for exploration of substrates across various

411 distances, however, the studies also indicate rhizomorphs produced by saprotrophic  
412 basidiomycetes are also effective in absorbing inorganic nutrients and water from the soil [46,  
413 50–52, 95, 96]. Experiments with *Armillaria mellea* [51, 52] and *Serpula lacrymans* [53, 54, 97]  
414 demonstrated the translocation of various nutrients, water, and carbon within the rhizomorphs.

415 To investigate transporter expression in our wood-decay system, we classified putative  
416 transporters in *A. ostoyae* and *A. cepistipes* based on conserved domains. We identified 612  
417 and 602 transporters in *A. ostoyae* and *A. cepistipes*, which belonged to 100 InterPro  
418 annotations with major facilitator superfamily domain, ABC-transporter like, sugar transporters,  
419 amino acid/polyamine transporters, and P-type ATPases being most abundant. Table S9 lists  
420 the identified transporters and their expression and abundances in the transcriptomic and  
421 proteomic data. Transcriptomics provided dynamics for a much larger number of transporters  
422 than proteomics, possibly due to the difficulty of extracting membrane proteins for LC/MS  
423 analyses. In the RNA-Seq data, we found 45 and 84 upregulated along with 96 and 105  
424 downregulated transporters in mycelium vs non-invasive mycelium in *A. ostoyae* and *A.*  
425 *cepistipes*, respectively (Fig 6). The majority of transporters upregulated in the mycelium vs  
426 non-invasive mycelium belonged to the major facilitator superfamily (MFS) and sugar  
427 transporter family. Considerably lower numbers of upregulated transporters were found in  
428 rhizomorphs: 2 and 20 upregulated in *A. ostoyae* and *A. cepistipes*, respectively from the same  
429 families.

430 A striking difference in the expression of transporters was found between rhizomorphs  
431 vs mycelium (Fig 6), with 120 and 100 upregulated and much fewer downregulated transporters  
432 in *A. ostoyae* and *A. cepistipes*, respectively. Compared to the total number of these  
433 transporters, the most upregulated transporters in rhizomorphs vs mycelium were the ones  
434 possibly involved in sugar transport, such as major facilitator sugar transport-like (IPR005828),  
435 sugar/inositol transporter (IPR003663), sugar transporters (IPR005829). Several aquaporin-like  
436 proteins, that were reported to be involved in mushroom development [98] and ectomycorrhizal  
437 functioning [99], were also upregulated in rhizomorph vs mycelium.

438 We also compared the upregulated transporters in rhizomorphs vs mycelium to fruiting  
439 body development regulated genes of *A. ostoyae* from Sipos et al [12], to identify transporters  
440 that are specifically upregulated in rhizomorphs but not in fruiting bodies. We reasoned that  
441 such genes might be involved in rhizomorph-specific functions rather than shared  
442 multicellularity-related functions between rhizomorphs and fruiting bodies. We found 47 such  
443 genes (Table S7), 39% of rhizomorph-upregulated transporters, including several MFS domains  
444 and sugar transporters. Collectively, our transporter data suggests rhizomorphs not being  
445 involved in active wood-decay rather they might be involved in the transfer of the decomposition  
446 intermediates between different parts of the colony.

447

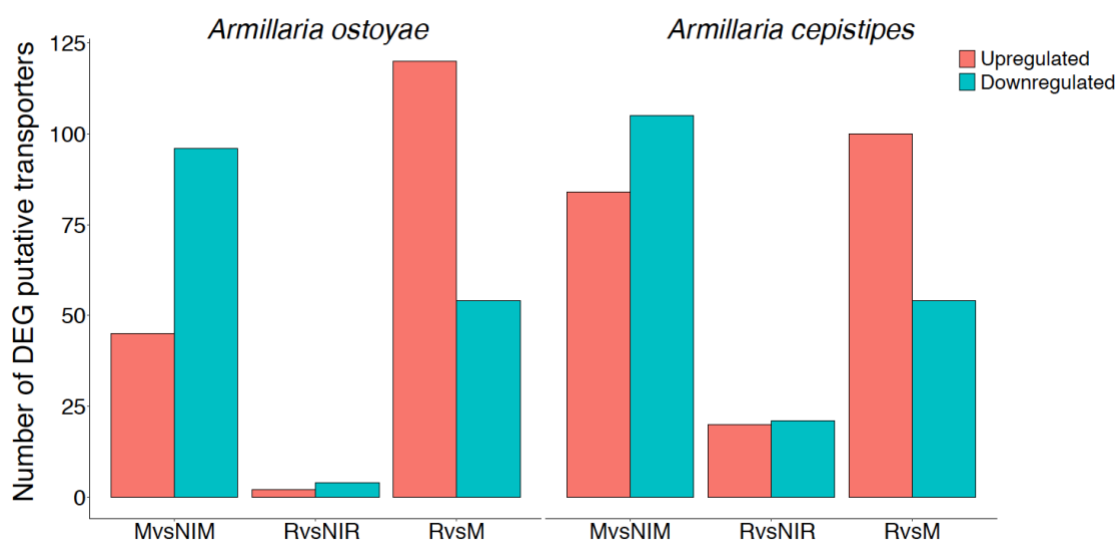

448  
449 Fig 6. Number of differentially expressed putative transporters in the two species. The number  
450 of upregulated (orange) and downregulated (blue-green) genes are shown for MvsNIM, RvsNIR  
451 and RvsM comparisons in the two species.

## 452 Conclusions

453 In this study, we examined wood-decay patterns by *Armillaria* spp. using transcriptomic and  
454 proteomic data on autoclaved spruce roots. Roots were primarily colonized by mycelial tissues,  
455 which harbored much more differentially expressed genes and differentially abundant proteins  
456 than rhizomorphs, suggesting that, although rhizomorphs can efficiently forage for nutrients,  
457 individual hyphae pierce and colonize woody tissues. Of the two species, the saprotroph *A.*  
458 *cepistipes* showed a much stronger molecular response to wood than did the pathogenic *A.*  
459 *ostoyae*. This pattern was evident both in terms of the number of differentially expressed  
460 genes/proteins and in gene expression dynamics (e.g. fold change) displayed by the two  
461 species. We observed a higher number of upregulated PCWDEs in *A. cepistipes* than in *A.*  
462 *ostoyae* with the latter species showing more down- than upregulation in PCWDEs. We  
463 speculate that these observations might reflect a general difference in wood-decay strategies of  
464 saprotrophic vs. pathogenic species. Because saprotrophs colonize dead wood, they likely face  
465 more intense competition with other microbes than do necrotrophic pathogens, which, after  
466 killing the host, are the very first colonizers and thus might face less competition. This might  
467 select for more aggressive wood-decay strategy in saprotrophs, which, in an assay like ours  
468 may manifest as a stronger induction of PCWDEs. In comparison, pathogens, which can also  
469 feed while the host is alive, may not be under a strong pressure to express a large suite of  
470 wood-decay enzymes. Similar observations were made in a study comparing gene expression  
471 during saprotrophic and parasitic phases in *Heterobasidion irregulare* [32]. It should be noted  
472 that these observations might also be influenced by the substrate (though spruce is a natural  
473 substrate for both species), the individual properties of the strains, and other factors, so more  
474 evidence, and experimental testing are needed to confirm this hypothesis.

475 Mycelia of *A. ostoyae* and *A. cepistipes* responded similarly to wood, with 713  
476 orthologous genes showing differential expression in both species. These include many plant  
477 cell wall degrading enzyme genes, hydrophobins, CBM67s, cytochrome p450s, transcription  
478 factors, and iron acquisition-related genes, among others. Pectinolytic PCWDE genes were  
479 dominant among CAZymes, followed by expansins, cellulose- and hemicellulose degrading  
480 ones, whereas ligninolytic PCWDE genes were mostly downregulated in our assay. The  
481 proportionately high number of pectin-related PCWDE-s mirrors comparative genomic  
482 observations that revealed enrichment of pectinolytic genes (in particular CBM67s) and  
483 expansins, but depletion of ligninolytic ones in *Armillaria* genomes [12]. Of particular interest are  
484 CBM67-s, which comprised 4 of the top 20 most induced co-orthologous genes in both species.  
485 There was a similar percentage of upregulated pectinolytic genes in the mycelium of *A.*  
486 *cepistipes* (ca. 38%) as in other studies examining early-phase decay (48% in *Pycnoporus*  
487 *coccineus* [100] and 45% in *Postia placenta* [78]), whereas the percentage was lower in *A.*  
488 *ostoyae* (17%). Ligninolytic genes, on the other hand, were underrepresented among  
489 DEGs/DAPs, consistent with their general underrepresentation in *Armillaria* genomes. This  
490 aligns well with previous reports of the limited lignin-degrading capacity of *Armillaria* spp. [38,  
491 39, 101].

492 Several aspects of the gene expression patterns in our assays are unusual for white-rot  
493 fungi. These include the lack of an early ligninolytic gene expression burst as is typical for white-  
494 rot fungi and the high expression of some genes (e.g. iron uptake systems, oxoglutarate/iron-  
495 dependent dioxygenases) that have been reported from brown rot fungi [67, 78, 85, 87–89].  
496 Previous studies questioned the typical white-rot nature of *Armillaria* [36, 38, 39, 101]. It was  
497 observed, through chemical analysis, that *Armillaria mellea* attacked celluloses in the early  
498 stages of decay, but not lignin [39, 101] and thus inferring that *Armillaria* performs a variety of  
499 white rot in which lignin degradation is not the primary concern. Almasi et al [102] also showed  
500 that, based on lignin-degrading genes, *Armillaria* spp. are intermediate between brown-rot and  
501 white-rot fungi, along with other species (*Schizophyllum commune*, *Auriculariopsis ampla*,  
502 *Cylindrobasidium torrendii*), that have been recalcitrant to this dichotomous classification [36,  
503 43], as well as ectomycorrhizal fungi with reduced ligninolytic repertoires. Of these, *C. torrendii*  
504 is a close relative of *Armillaria* in the Physalacriaceae. Floudas et al showed that the reduced  
505 ligninolytic gene repertoire of *C. torrendii* is a result of gene loss compared to its white-rot  
506 ancestors and that the decay caused by this species resembles soft rot. While soft rot in the  
507 strict sense is characteristic of the Ascomycota, several Basidiomycetes have been associated  
508 with Type II (e.g. *C. torrendii* [36]) or Type I (e.g. *Armillaria* spp. [38]) soft rot. These species are  
509 characterized by a complete set of PCWDEs for degrading (hemi)cellulose, but a depletion of  
510 ligninolytic ones. More generally, a selective deployment of ligninolytic activity has been  
511 reported in a number of species. *Mucidula mucida* (also Physalacriaceae, as *Oudemansiella*  
512 *mucida*) and *Meripilus giganteus* (Polyporales) caused either soft or white rot, depending on  
513 decay stage and substrate (host species and cell type) [103, 104].

514 Wood decay resembling soft rot has been reported also for several early-diverging  
515 Agaricomycetes (e.g. in non-mycorrhizal Cantharellales), which predate the origin of ligninolytic  
516 class II peroxidases [17, 43, 44]. We hypothesized that early diverging Agaricomycetes and  
517 more derived species that lost some of their ligninolytic but not their cellulolytic gene repertoires  
518 (e.g. *Jaapia*, *Schizophyllum*), reverted to a plesiomorphic soft-rot like decay chemistry, which is



519 primarily dominated by cellulolytic and pectinolytic functions [44]. It appears that this is a  
520 particular characteristic of the Physalacriaceae (e.g. *Armillaria*, *Mucidula*, *Cylindrobasidium*),  
521 which lost some ligninolytic genes compared to their white-rot ancestors but evolved  
522 mechanisms for selectively deploying the remaining ligninolytic genes based on environmental  
523 factors. We think that the combination of (i) a widely conserved plesiomorphic soft rot-like wood  
524 decay strategy and (ii) the ability to degrade lignin in white rot, enables Agaricomycetes to  
525 toggle between soft- and white rot either by gene loss or by gene expression regulation. Thus, it  
526 is possible that temporal or substrate-dependent regulation of the activation of ligninolysis can  
527 separate soft- and white- rot behaviors of some species, adding further complexity to the range  
528 of decay modes of Basidiomycota.

529

## 530 Methods

### 531 Wood colonization assay and RNA-Extraction

532 Cultures of *Armillaria ostoyae* C18 and *Armillaria cepistipes* B2 [12] were inoculated on Malt  
533 extract agar (MEA) and incubated at 25°C in dark for a week. 4-5 cm long, autoclave sterilized  
534 spruce roots were introduced to the week-old cultures of *A. ostoyae* and *A. cepistipes* and were  
535 again kept at 25°C in the dark for 2-3 weeks until they were colonized by the fungi (Fig 1B).  
536 After colonization, roots were dissected to collect mycelium from below the outer bark layer and  
537 rhizomorphs emerging out of the colonized wood (Fig 1B). Cultures of *Armillaria* without the  
538 addition of sterilized spruce roots were used as non-invasive controls. Total RNA was extracted  
539 from the four tissue types in three biological replicates, using the Quick-RNA Miniprep kit (Zymo  
540 Research, Irvine, CA, USA), following the manufacturer's protocol.

541

### 542 RNA-Seq library generation and sequencing

543 RNA-Seq analyses were carried out by using Ribo-Zero rRNA removal kit (Yeast) to deplete  
544 rRNA from total RNA. Subsequently, samples were processed with Illumina TruSeq V2 library  
545 preparation protocol. Libraries were sequenced on an Illumina NextSeq 500 machine yielding  
546 2x150 nt reads.

547

### 548 Protein extraction

549 For protein extraction, tissues were snap-frozen in liquid N<sub>2</sub> and bead beaten periodically (30  
550 Hz, 2 min), with snap freezing between cycles. Lysis buffer (6M Guanidine-HCl, 0.1 M Tris-HCl,  
551 50 mM DTT pH 8.6) was added to crushed fungal tissue and bead-beating was repeated.  
552 Samples were further disrupted using sonication (MS72 probe, 3 x 10 sec), with cooling on ice  
553 between sonications. Samples were clarified by centrifugation and supernatants passed through  
554 3 kDa cut-off filters (Millipore) to concentrate and perform buffer exchange into PBS. Protein  
555 samples were precipitated with TCA (final 15 % w/v) and pellets were washed with ice-cold  
556 acetone. Protein pellets were resuspended in UT buffer (6 M Urea, 2M Thiourea, 0.1 M Tris-HCl

557 pH 8) and concentrations normalized following Bradford protein assay. Samples were digested  
558 according to Moloney et al [105] and ZipTips (Millipore) were used for sample clean-up. Peptide  
559 samples were analyzed using the high mass accuracy Q-Exactive mass spectrometer coupled  
560 to a Dionex Ultimate 3000 nanoLC with an EasySpray PepMap C18 column (50 cm x 75 µm).  
561 Peptide mixtures were separated as described in Collins et al [106] and resultant data were  
562 analyzed using MaxQuant (v 1.5.3.30) [107] with the label-free quantitation (LFQ) algorithms  
563 and searching against the protein database (filtered models) in JGI MycoCosm [12].

#### 564 Bioinformatic analyses of RNA-Seq data.

565 Paired-end Illumina (HiSeq, NextSeq) reads were quality trimmed using the CLC Genomics  
566 Workbench tool version 11.0 (CLC Bio/Qiagen) removing ambiguous nucleotides as well as any  
567 low quality read end parts. The quality cutoff value (error probability) was set to 0.05,  
568 corresponding to a Phred score of 13. Trimmed reads containing at least 40 bases were  
569 mapped using the RNA-Seq Analysis 2.16 package in CLC requiring at least 80% sequence  
570 identity over at least 80% of the read lengths; strand specificity was omitted. List of reference  
571 sequences is provided in Table S1 along with the mapping statistics for both species. Reads  
572 with less than 30 equally scoring mapping positions were mapped to all possible locations while  
573 reads with more than 30 potential mapping positions were considered as uninformative repeat  
574 reads and were removed from the analysis. “Total counts” RNA-Seq count data was imported  
575 from CLC into R version 3.0.2. Genes were filtered based on their expression levels keeping  
576 only those features that were detected by at least five mapped reads in at least 25% of the  
577 samples included in the study. Subsequently, “calcNormFactors” from “edgeR” version 3.4.2  
578 [108] was used to perform data scaling based on the “trimmed mean of M-values” (TMM)  
579 method [109]. Log transformation was carried out by the “voom” function of the “limma” package  
580 version 3.18.13 [110]. Linear modeling, empirical Bayes moderation as well as the calculation of  
581 differentially expressed genes were carried out using “limma”. Genes showing an at least two-  
582 fold gene expression change with an FDR value below 0.05 were considered as significant.  
583 Multidimensional scaling (“plotMDS” function in edgeR) was applied to visually summarize gene  
584 expression profiles. In addition, unsupervised cluster analysis with Euclidean distance  
585 calculation and complete-linkage clustering was carried out on the normalized data using  
586 “heatmap.2” function from R package “gplots”.

#### 587 Data availability

588 RNA-Seq data was deposited in the NCBI's Gene Expression Omnibus (GEO) Archive at  
589 [www.ncbi.nlm.nih.gov/geo](http://www.ncbi.nlm.nih.gov/geo) (accession no. GSE149732).

590

#### 591 Analyses of proteomic data

592 Proteomic results were organized and statistical analyses were performed using Perseus (v  
593 1.5.4.0) [111]. Qualitative and quantitative analyses were performed to determine the relative  
594 changes in protein abundance in each of the sample types. Quantitative analysis was performed  
595 using a student's t-test with a p-value cut-off of 0.05 and  $\log_2(\text{fold change; FC}) \geq 1$ . Qualitative

596 analysis revealed proteins that were detected in 2/3 replicates for a sample type and  
597 undetectable in all replicates of the comparator group. A theoretical minimum fold change was  
598 determined for qualitative results based on a calculated minimum detectable protein intensity  
599 (mean + 2 standard deviations of lowest detectable protein intensity for each replicate in the  
600 experiment) [105]. Based on this theoretical minimum fold change, some qualitative results were  
601 excluded due to intensity values approaching the minimum detectable levels. Qualitative and  
602 quantitative results were combined and a total number of differentially abundant proteins (DAPs)  
603 are summarised in Table S3 and Fig 1E.

#### 604 Clustering analysis and functional annotation

605 Predicted protein sequences from JGI MycoCosm were used to find the orthologs in *A. ostoyae*  
606 and *A. cepistipes* by OrthoFinder v2.3.1 [62] (default parameters). Single-copy orthologs for the  
607 two species (Table S5) were further analyzed for comparing the expression patterns in the two  
608 species. Functional annotation was carried out based on Interpro domains using InterProScan  
609 v5.24-63.0 [112].

610 Enriched GO terms for different comparisons were predicted by the topGO package  
611 [113], using the weight01 algorithm and Fisher testing. Terms with p-values less than 0.05 were  
612 considered significant and were plotted with respect to their gene ratios in (Fig 2, Fig S4), where  
613 gene ratio is the number of a particular GO term in a specific comparison type to the total  
614 number of that term found in the gene list for that organism (Table S4).

615 The CAZyme copy numbers in *A. ostoyae* and *A. cepistipes* were collected from the JGI  
616 mycocosm annotations, which were based on the CAZy annotation pipeline [84]. We separated  
617 the CAZy families based on their substrate-specific plant cell wall degradation abilities (Table  
618 S6) and analyzed the copy numbers of differentially expressed genes and differentially  
619 abundant proteins for cellulases, hemicellulases, pectinases, expansins and ligninases in the  
620 MvsNIM and RvsNIR comparisons.

621 Transporters were identified by using DeepLoc [114] to select plasma membrane-  
622 localized proteins from the proteomes of both species. Plasma membrane-localized proteins  
623 with more than 1 transmembrane domains were used to obtain a list of non-redundant InterPro  
624 domains, which were manually checked for functional roles in transport.

#### 625 Acknowledgments

626 The authors acknowledge support by the Hungarian National Research, Development and  
627 Innovation Office (contract No. GINOP-2.3.2-15-2016-00052), the 'Momentum' program of the  
628 Hungarian Academy of Sciences (contract No. LP2019-13/2019 to L.G.N.) and the European  
629 Research Council (grant no. 758161 to L.G.N.). Proteomics instrumentation was funded by a  
630 competitive Science Foundation Ireland (SFI) Infrastructure award (12/RI/2346 [3])  
631

## 632 Competing Interests

633 The authors declare that they have no conflict of interest.

634

## 635 References:

- 636 1. Baumgartner K, Rizzo DM. Distribution of *Armillaria* species in California. *Mycologia* 2001;  
637 **93**: 821–830.
- 638 2. Baumgartner K, Rizzo DM. Ecology of *Armillaria* spp. in Mixed-Hardwood Forests of  
639 California. *Plant Dis* 2001; **85**: 947–951.
- 640 3. Hood IA, Redfern DB, Kile GA. Armillaria Root Disease. *Armillaria Root Disease*. 1991.  
641 USDA Forest Service, Washington, D.C, pp 122–149.
- 642 4. Baumgartner K, Coetzee MPA, Hoffmeister D. Secrets of the subterranean pathosystem of  
643 *Armillaria*: Subterranean pathosystem of *Armillaria*. *Mol Plant Pathol* 2011; **12**: 515–534.
- 644 5. Filip GM, Fitzgerald SA, Chadwick KL, Max TA. Thinning Ponderosa Pine Affected by  
645 *Armillaria* Root Disease: 40 Years of Growth and Mortality on an Infected Site in Central  
646 Oregon. *West J Appl For* 2009; **24**: 88–94.
- 647 6. Filip GM, Maffei HM, Chadwick KL, Max TA. *Armillaria* Root Disease-Caused Tree  
648 Mortality following Silvicultural Treatments (Shelterwood or Group Selection) in an Oregon  
649 Mixed-Conifer Forest: Insights from a 10-Year Case Study. *West J Appl For* 2010; **25**:  
650 136–143.
- 651 7. Cruickshank MG, Morrison DJ, Lalumière A. Site, plot, and individual tree yield reduction of  
652 interior Douglas-fir associated with non-lethal infection by *Armillaria* root disease in  
653 southern British Columbia. *For Ecol Manag* 2011; **261**: 297–307.
- 654 8. Keča N, Karadžić D, Woodward S. Ecology of *Armillaria* species in managed forests and  
655 plantations in Serbia. *For Pathol* 2009; **39**: 217–231.
- 656 9. Wong JW -H., Plett KL, Natera SHA, Roessner U, Anderson IC, Plett JM. Comparative  
657 metabolomics implicates threitol as a fungal signal supporting colonization of *Armillaria*

- 658 *luteobubalina* on eucalypt roots. *Plant Cell Environ* 2020; **43**: 374–386.
- 659 10. Chen L, Bóka B, Kedves O, Nagy VD, Szűcs A, Champramary S, et al. Towards the  
660 Biological Control of Devastating Forest Pathogens from the Genus *Armillaria*. *Forests*  
661 2019; **10**: 1013.
- 662 11. Sipos G, Anderson JB, Nagy LG. *Armillaria*. *Curr Biol* 2018; **28**: PR297-R298.
- 663 12. Sipos G, Prasanna AN, Walter MC, O'Connor E, Bálint B, Krizsán K, et al. Genome  
664 expansion and lineage-specific genetic innovations in the forest pathogenic fungi  
665 *Armillaria*. *Nat Ecol Evol* 2017; **1**: 1931–1941.
- 666 13. Prospero S, Holdenrieder O, Rigling D. Comparison of the virulence of *Armillaria cepistipes*  
667 and *Armillaria ostoyae* on four Norway spruce provenances. *For Pathol* 2004; **34**: 1–14.
- 668 14. Worrall JJ, Anagnost SE, Zabel RA. Comparison of Wood Decay among Diverse  
669 Lignicolous Fungi. *Mycologia* 1997; **89**: 199.
- 670 15. Ross-Davis AL, Stewart JE, Hanna JW, Kim M-S, Knaus BJ, Cronn R, et al. Transcriptome  
671 of an *Armillaria* root disease pathogen reveals candidate genes involved in host substrate  
672 utilization at the host-pathogen interface. *For Pathol* 2013; **43**: 468–477.
- 673 16. Collins C, Keane TM, Turner DJ, O'Keeffe G, Fitzpatrick DA, Doyle S. Genomic and  
674 Proteomic Dissection of the Ubiquitous Plant Pathogen, *Armillaria mellea*: Toward a New  
675 Infection Model System. *J Proteome Res* 2013; **12**: 2552–2570.
- 676 17. Floudas D, Binder M, Riley R, Barry K, Blanchette RA, Henrissat B, et al. The Paleozoic  
677 Origin of Enzymatic Lignin Decomposition Reconstructed from 31 Fungal Genomes.  
678 *Science* 2012; **336**: 1715–1719.
- 679 18. Hatakka A. Lignin-modifying enzymes from selected white-rot fungi: production and role  
680 from in lignin degradation. *FEMS Microbiol Rev* 1994; **13**: 125–135.
- 681 19. Ayuso-Fernández I, Rencoret J, Gutiérrez A, Ruiz-Dueñas FJ, Martínez AT. Peroxidase  
682 evolution in white-rot fungi follows wood lignin evolution in plants. *Proc Natl Acad Sci* 2019;  
683 **116**: 17900–17905.

- 684 20. Rytioja J, Hildén K, Yuzon J, Hatakka A, de Vries RP, Mäkelä MR. Plant-Polysaccharide-  
685 Degrading Enzymes from Basidiomycetes. *Microbiol Mol Biol Rev* 2014; **78**: 614–649.
- 686 21. Lundell TK, Mäkelä MR, Hildén K. Lignin-modifying enzymes in filamentous  
687 basidiomycetes - ecological, functional and phylogenetic review. *J Basic Microbiol* 2010;  
688 **50**: 5–20.
- 689 22. Lundell TK, Mäkelä MR, de Vries RP, Hildén KS. Genomics, Lifestyles and Future  
690 Prospects of Wood-Decay and Litter-Decomposing Basidiomycota. *Advances in Botanical*  
691 *Research*. 2014. Elsevier, pp 329–370.
- 692 23. Várnai A, Mäkelä MR, Djajadi DT, Rahikainen J, Hatakka A, Viikari L. Carbohydrate-  
693 Binding Modules of Fungal Cellulases. *Advances in Applied Microbiology*. 2014. Elsevier,  
694 pp 103–165.
- 695 24. Jurak E, Suzuki H, van Erven G, Gandier JA, Wong P, Chan K, et al. Dynamics of the  
696 *Phanerochaete carnosae* transcriptome during growth on aspen and spruce. *BMC*  
697 *Genomics* 2018; **19**.
- 698 25. Vanden Wymelenberg A, Gaskell J, Mozuch M, Splinter BonDurant S, Sabat G, Ralph J, et  
699 al. Significant Alteration of Gene Expression in Wood Decay Fungi *Postia placenta* and  
700 *Phanerochaete chrysosporium* by Plant Species. *Appl Environ Microbiol* 2011; **77**: 4499–  
701 4507.
- 702 26. Vanden Wymelenberg A, Gaskell J, Mozuch M, Kersten P, Sabat G, Martinez D, et al.  
703 Transcriptome and Secretome Analyses of *Phanerochaete chrysosporium* Reveal  
704 Complex Patterns of Gene Expression. *Appl Environ Microbiol* 2009; **75**: 4058–4068.
- 705 27. Korripally P, Hunt CG, Houtman CJ, Jones DC, Kitin PJ, Cullen D, et al. Regulation of  
706 Gene Expression during the Onset of Ligninolytic Oxidation by *Phanerochaete*  
707 *chrysosporium* on Spruce Wood. *Appl Environ Microbiol* 2015; **81**: 7802–7812.
- 708 28. Gaskell J, Marty A, Mozuch M, Kersten PJ, Splinter BonDurant S, Sabat G, et al. Influence  
709 of *Populus* Genotype on Gene Expression by the Wood Decay Fungus *Phanerochaete*

- 710 chryso sporium. *Appl Environ Microbiol* 2014; **80**: 5828–5835.
- 711 29. Hori C, Gaskell J, Igarashi K, Kersten P, Mozuch M, Samejima M, et al. Temporal  
712 Alterations in the Secretome of the Selective Ligninolytic Fungus *Ceriporiopsis*  
713 *subvermispora* during Growth on Aspen Wood Reveal This Organism’s Strategy for  
714 Degrading Lignocellulose. *Appl Environ Microbiol* 2014; **80**: 2062–2070.
- 715 30. Oghenekaro AO, Raffaello T, Kovalchuk A, Asiegbu FO. De novo transcriptomic assembly  
716 and profiling of *Rigidoporus microporus* during saprotrophic growth on rubber wood. *BMC*  
717 *Genomics* 2016; **17**.
- 718 31. Oghenekaro A, Daniel G, Asiegbu F. The saprotrophic wood-degrading abilities of  
719 *Rigidoporus microporus*. *Silva Fenn* 2015; **49**.
- 720 32. Olson Å, Aerts A, Asiegbu F, Belbahri L, Bouzid O, Broberg A, et al. Insight into trade-off  
721 between wood decay and parasitism from the genome of a fungal forest pathogen. *New*  
722 *Phytol* 2012; **194**: 1001–1013.
- 723 33. Zeng Z, Wu J, Kovalchuk A, Raffaello T, Wen Z, Liu M, et al. Genome-wide DNA  
724 methylation and transcriptomic profiles in the lifestyle strategies and asexual development  
725 of the forest fungal pathogen *Heterobasidion parviporum*. *Epigenetics* 2019; **14**: 16–40.
- 726 34. Kovalchuk A, Zeng Z, Ghimire RP, Kivimäenpää M, Raffaello T, Liu M, et al. Dual RNA-seq  
727 analysis provides new insights into interactions between Norway spruce and necrotrophic  
728 pathogen *Heterobasidion annosum* s.l. *BMC Plant Biol* 2019; **19**.
- 729 35. Teixeira PJPL, Thomazella DP de T, Reis O, do Prado PFV, do Rio MCS, Fiorin GL, et al.  
730 High-Resolution Transcript Profiling of the Atypical Biotrophic Interaction between  
731 *Theobroma cacao* and the Fungal Pathogen *Moniliophthora perniciosa*. *Plant Cell* 2014;  
732 **26**: 4245–4269.
- 733 36. Floudas D, Held BW, Riley R, Nagy LG, Koehler G, Ransdell AS, et al. Evolution of novel  
734 wood decay mechanisms in Agaricales revealed by the genome sequences of *Fistulina*  
735 *hepatica* and *Cylindrobasidium torrendii*. *Fungal Genet Biol* 2015; **76**: 78–92.

- 736 37. Collins C, Hurley R, Almutlaqah N, O’Keeffe G, Keane T, Fitzpatrick D, et al. Proteomic  
737 Characterization of *Armillaria mellea* Reveals Oxidative Stress Response Mechanisms and  
738 Altered Secondary Metabolism Profiles. *Microorganisms* 2017; **5**: 60.
- 739 38. Schwarze FW. Wood decay under the microscope. *Fungal Biol Rev* 2007; **21**: 133–  
740 170.
- 741 39. Campbell WG. The chemistry of the white rots of wood. *Biochem J* 1931; **25**: 2023–2027.
- 742 40. Levy J. The Soft Rot Fungi: Their Mode of Action and Significance in the Degradation of  
743 Wood. *Advances in Botanical Research*. 1966. Elsevier, pp 323–357.
- 744 41. Blanchette RA, Held BW, Jurgens JA, McNew DL, Harrington TC, Duncan SM, et al.  
745 Wood-Destroying Soft Rot Fungi in the Historic Expedition Huts of Antarctica. *Appl Environ*  
746 *Microbiol* 2004; **70**: 1328–1335.
- 747 42. Savory JG. BREAKDOWN OF TIMBER BY ASCOMYCETES AND FUNGI IMPERFECTI.  
748 *Ann Appl Biol* 1954; **41**: 336–347.
- 749 43. Riley R, Salamov AA, Brown DW, Nagy LG, Floudas D, Held BW, et al. Extensive  
750 sampling of basidiomycete genomes demonstrates inadequacy of the white-rot/brown-rot  
751 paradigm for wood decay fungi. *Proc Natl Acad Sci* 2014; **111**: 9923–9928.
- 752 44. Nagy LG, Riley R, Tritt A, Adam C, Daum C, Floudas D, et al. Comparative Genomics of  
753 Early-Diverging Mushroom-Forming Fungi Provides Insights into the Origins of  
754 Lignocellulose Decay Capabilities. *Mol Biol Evol* 2016; **33**: 959–970.
- 755 45. Reina R, Kellner H, Hess J, Jehmlich N, García-Romera I, Aranda E, et al. Genome and  
756 secretome of *Chondrostereum purpureum* correspond to saprotrophic and  
757 phytopathogenic life styles. *PLOS ONE* 2019; **14**: e0212769.
- 758 46. Cairney JW. Rhizomorphs: Organs of exploration or exploitation? *Mycologist* 1991; **5**: 5–  
759 10.
- 760 47. Yafetto L, Davis DJ, Money NP. Biomechanics of invasive growth by *Armillaria*  
761 rhizomorphs. *Fungal Genet Biol* 2009; **46**: 688–694.



- 762 48. Mihail JD, Bruhn JN. Foraging behaviour of *Armillaria* rhizomorph systems. *Mycol Res*  
763 2005; **109**: 1195–1207.
- 764 49. Cairney JWG. Translocation of solutes in ectomycorrhizal and saprotrophic rhizomorphs.  
765 *Mycol Res* 1992; **96**: 135–141.
- 766 50. Cairney JWG, Jennings DH, Ratcliffe RG, Southon TE. The physiology of basidiomycete  
767 linear organs II. Phosphate uptake by rhizomorphs of *armillaria mellea*. *New Phytol* 1988;  
768 **109**: 327–333.
- 769 51. Anderson JB, Ullrich RC. Translocation in rhizomorphs of *Armillaria mellea*. *Exp Mycol*  
770 1982; **6**: 31–40.
- 771 52. Granlund HI, Jennings DH, Thompson W. Translocation of solutes along rhizomorphs of  
772 *Armillaria mellea*. *Trans Br Mycol Soc* 1985; **84**: 111–119.
- 773 53. Brownlee C, Jennings DH. Long distance translocation in *Serpula lacrimans*: Velocity  
774 estimates and the continuous monitoring of induced perturbations. *Trans Br Mycol Soc*  
775 1982; **79**: 143–148.
- 776 54. Brownlee C, Jennings DH. Pathway of translocation in *Serpula lacrimans*. *Trans Br Mycol*  
777 *Soc* 1982; **79**: 401–407.
- 778 55. Redfern DB. Infection by *Armillaria mellea* and some Factors Affecting Host Resistance  
779 and the Severity of Disease. *Forestry* 1978; **51**: 121–135.
- 780 56. Leach R. Observations on the parasitism and control of *Armillaria mellea*. *Proc R Soc Lond*  
781 *Ser B - Biol Sci* 1937; **121**: 561–573.
- 782 57. Pronos J, Patton RF. Penetration and colonization of oak roots by *Armillaria mellea* in  
783 Wisconsin. *For Pathol* 1978; **8**: 259–267.
- 784 58. Aanen DK. How a long-lived fungus keeps mutations in check. *Science* 2014; **346**: 922–  
785 923.
- 786 59. Anderson JB, Bruhn JN, Kasimer D, Wang H, Rodrigue N, Smith ML. Clonal evolution and  
787 genome stability in a 2500-year-old fungal individual. *Proc R Soc B Biol Sci* 2018; **285**:

- 788 20182233.
- 789 60. Guillaumin J-J, Mohammed C, Anselmi N, Courtecuisse R, Gregory SC, Holdenrieder O, et  
790 al. Geographical distribution and ecology of the *Armillaria* species in western Europe. *For*  
791 *Pathol* 1993; **23**: 321–341.
- 792 61. Shi L, Dossa GGO, Paudel E, Zang H, Xu J, Harrison RD. Changes in Fungal  
793 Communities across a Forest Disturbance Gradient. *Appl Environ Microbiol* 2019; **85**.
- 794 62. Emms DM, Kelly S. OrthoFinder: solving fundamental biases in whole genome  
795 comparisons dramatically improves orthogroup inference accuracy. *Genome Biol* 2015; **16**.
- 796 63. Arvind L, Koonin VE. The DNA-repair protein AlkB, EGL-9, and leprecan define new  
797 families of 2-oxoglutarate- and iron-dependent dioxygenases. *Genome Biol* 2001; **2**.
- 798 64. Martinez S, Hausinger RP. Catalytic Mechanisms of Fe(II)- and 2-Oxoglutarate-dependent  
799 Oxygenases. *J Biol Chem* 2015; **290**: 20702–20711.
- 800 65. Korvald H, Mølsted Moe AM, Cederkvist FH, Thiede B, Laerdahl JK, Bjørås M, et al.  
801 *Schizosaccharomyces pombe* Ofd2 Is a Nuclear 2-Oxoglutarate and Iron Dependent  
802 Dioxygenase Interacting with Histones. *PLoS ONE* 2011; **6**: e25188.
- 803 66. Young D, Rice J, Martin R, Lindquist E, Lipzen A, Grigoriev I, et al. Degradation of Bunker  
804 C Fuel Oil by White-Rot Fungi in Sawdust Cultures Suggests Potential Applications in  
805 Bioremediation. *PLOS ONE* 2015; **10**: e0130381.
- 806 67. Shah F, Nicolás C, Bentzer J, Ellström M, Smits M, Rineau F, et al. Ectomycorrhizal fungi  
807 decompose soil organic matter using oxidative mechanisms adapted from saprotrophic  
808 ancestors. *New Phytol* 2016; **209**: 1705–1719.
- 809 68. Moody SC, Dudley E, Hiscox J, Boddy L, Eastwood DC. Interdependence of Primary  
810 Metabolism and Xenobiotic Mitigation Characterizes the Proteome of *Bjerkandera adusta*  
811 during Wood Decomposition. *Appl Environ Microbiol* 2017; **84**.
- 812 69. Kawai Y, Ono E, Mizutani M. Evolution and diversity of the 2-oxoglutarate-dependent  
813 dioxygenase superfamily in plants. *Plant J* 2014; **78**: 328–343.

- 814 70. Farrow SC, Facchini PJ. Functional diversity of 2-oxoglutarate/Fe(II)-dependent  
815 dioxxygenases in plant metabolism. *Front Plant Sci* 2014; **5**.
- 816 71. Bhattacharya A, Kourmpetli S, Ward DA, Thomas SG, Gong F, Powers SJ, et al.  
817 Characterization of the Fungal Gibberellin Desaturase as a 2-Oxoglutarate-Dependent  
818 Dioxxygenase and Its Utilization for Enhancing Plant Growth. *Plant Physiol* 2012; **160**: 837–  
819 845.
- 820 72. Bey M, Zhou S, Poidevin L, Henrissat B, Coutinho PM, Berrin J-G, et al. Cello-  
821 Oligosaccharide Oxidation Reveals Differences between Two Lytic Polysaccharide  
822 Monooxygenases (Family GH61) from *Podospira anserina*. *Appl Environ Microbiol* 2013;  
823 **79**: 488–496.
- 824 73. Morgenstern I, Powlowski J, Tsang A. Fungal cellulose degradation by oxidative enzymes:  
825 from dysfunctional GH61 family to powerful lytic polysaccharide monooxygenase family.  
826 *Brief Funct Genomics* 2014; **13**: 471–481.
- 827 74. Quinlan RJ, Sweeney MD, Lo Leggio L, Otten H, Poulsen J-CN, Johansen KS, et al.  
828 Insights into the oxidative degradation of cellulose by a copper metalloenzyme that exploits  
829 biomass components. *Proc Natl Acad Sci* 2011; **108**: 15079–15084.
- 830 75. Beeson WT, Phillips CM, Cate JHD, Marletta MA. Oxidative Cleavage of Cellulose by  
831 Fungal Copper-Dependent Polysaccharide Monooxygenases. *J Am Chem Soc* 2012; **134**:  
832 890–892.
- 833 76. Li X, Beeson WT, Phillips CM, Marletta MA, Cate JHD. Structural Basis for Substrate  
834 Targeting and Catalysis by Fungal Polysaccharide Monooxygenases. *Structure* 2012; **20**:  
835 1051–1061.
- 836 77. Levasseur A, Drula E, Lombard V, Coutinho PM, Henrissat B. Expansion of the enzymatic  
837 repertoire of the CAZy database to integrate auxiliary redox enzymes. *Biotechnol Biofuels*  
838 2013; **6**: 41.
- 839 78. Zhang J, Presley GN, Hammel KE, Ryu J-S, Menke JR, Figueroa M, et al. Localizing gene

- 840 regulation reveals a staggered wood decay mechanism for the brown rot fungus *Postia*  
841 *placenta*. *Proc Natl Acad Sci* 2016; **113**: 10968–10973.
- 842 79. Presley GN, Panisko E, Purvine SO, Schilling JS. Coupling Secretomics with Enzyme  
843 Activities To Compare the Temporal Processes of Wood Metabolism among White and  
844 Brown Rot Fungi. *Appl Environ Microbiol* 2018; **84**.
- 845 80. Qin X, Su X, Luo H, Ma R, Yao B, Ma F. Deciphering lignocellulose deconstruction by the  
846 white rot fungus *Irpex lacteus* based on genomic and transcriptomic analyses. *Biotechnol*  
847 *Biofuels* 2018; **11**.
- 848 81. Giraud I, Fonty G, Besle J. Effect of sterilization by autoclaving of maize and sugarcane  
849 bagasse cell walls on chemical and biological susceptibility. *Reprod Nutr Dev* 1997; **EDP**  
850 **Sciences**: 56.
- 851 82. Makkar HPS, Singh B. Effect of Steaming and Autoclaving Oak (*Quercus incana*) leaves  
852 on levels of tannins, fibre and lignin and in-sacco dry matter digestibility. *J Sci Food Agric*  
853 1992; **59**: 469–472.
- 854 83. Wunna K., Nakasaki K., Auresenia J.L., Abella L.C., Gaspillo P.D. Effect of alkali  
855 pretreatment on removal of lignin from sugarcane bagasse. *Chem Eng Trans* 2017; **56**:  
856 1831–1836.
- 857 84. Lombard V, Golaconda Ramulu H, Drula E, Coutinho PM, Henrissat B. The carbohydrate-  
858 active enzymes database (CAZy) in 2013. *Nucleic Acids Res* 2014; **42**: D490–D495.
- 859 85. Sista Kameshwar AK, Qin W. Systematic review of publicly available non-Dikarya fungal  
860 proteomes for understanding their plant biomass-degrading and bioremediation potentials.  
861 *Bioresour Bioprocess* 2019; **6**.
- 862 86. Larrondo LF, Canessa P, Melo F, Polanco R, Vicuna R. Cloning and characterization of  
863 the genes encoding the high-affinity iron-uptake protein complex Fet3/Ftr1 in the  
864 basidiomycete *Phanerochaete chrysosporium*. *Microbiology* 2007; **153**: 1772–1780.
- 865 87. Gaskell J, Blanchette RA, Stewart PE, BonDurant SS, Adams M, Sabat G, et al.

- 866 Transcriptome and Secretome Analyses of the Wood Decay Fungus *Wolfiporia cocos*  
867 Support Alternative Mechanisms of Lignocellulose Conversion. *Appl Environ Microbiol*  
868 2016; **82**: 3979–3987.
- 869 88. Martinez D, Challacombe J, Morgenstern I, Hibbett D, Schmoll M, Kubicek CP, et al.  
870 Genome, transcriptome, and secretome analysis of wood decay fungus *Postia placenta*  
871 supports unique mechanisms of lignocellulose conversion. *Proc Natl Acad Sci* 2009; **106**:  
872 1954–1959.
- 873 89. Zhang J, Silverstein KAT, Castaño JD, Figueroa M, Schilling JS. Gene Regulation Shifts  
874 Shed Light on Fungal Adaption in Plant Biomass Decomposers. *mBio* 2019; **10**.
- 875 90. Martinez D, Larrondo LF, Putnam N, Gelpke MDS, Huang K, Chapman J, et al. Genome  
876 sequence of the lignocellulose degrading fungus *Phanerochaete chrysosporium* strain  
877 RP78. *Nat Biotechnol* 2004; **22**: 695–700.
- 878 91. Tsitsigiannis DI, Zarnowski R, Keller NP. The Lipid Body Protein, PpoA, Coordinates  
879 Sexual and Asexual Sporulation in *Aspergillus nidulans*. *J Biol Chem* 2004; **279**: 11344–  
880 11353.
- 881 92. Tsitsigiannis DI, Bok J-W, Andes D, Nielsen KF, Frisvad JC, Keller NP. *Aspergillus*  
882 Cyclooxygenase-Like Enzymes Are Associated with Prostaglandin Production and  
883 Virulence. *Infect Immun* 2005; **73**: 4548–4559.
- 884 93. Scala V, Giorni P, Cirlini M, Ludovici M, Visentin I, Cardinale F, et al. LDS1-produced  
885 oxylipins are negative regulators of growth, conidiation and fumonisin synthesis in the  
886 fungal maize pathogen *Fusarium verticillioides*. *Front Microbiol* 2014; **5**.
- 887 94. Jennings DH. TRANSLOCATION OF SOLUTES IN FUNGI. *Biol Rev* 1987; **62**: 215–243.
- 888 95. Clipson NJW, Cairney JWG, Jennings DH. THE PHYSIOLOGY OF BASIDIOMYCETE  
889 LINEAR ORGANS. I. PHOSPHATE UPTAKE BY CORDS AND MYCELIUM IN THE  
890 LABORATORY AND THE FIELD. *New Phytol* 1987; **105**: 449–157.
- 891 96. Wells JM, Boddy L. Wood decay, and phosphorus and fungal biomass allocation, in

- 892 mycelial cord systems. *New Phytol* 1990; **116**: 285–295.
- 893 97. Watkinson SC. Phosphorus translocation in the stranded and unstranded mycelium of  
894 *Serpula lacrimans*. *Trans Br Mycol Soc* 1971; **57**: 535–539.
- 895 98. Krizsán K, Almási É, Merényi Z, Sahu N, Virágh M, Kószó T, et al. Transcriptomic atlas of  
896 mushroom development reveals conserved genes behind complex multicellularity in fungi.  
897 *Proc Natl Acad Sci* 2019; **116**: 7409–7418.
- 898 99. Peter M, Kohler A, Ohm RA, Kuo A, Krützmann J, Morin E, et al. Ectomycorrhizal ecology  
899 is imprinted in the genome of the dominant symbiotic fungus *Cenococcum geophilum*. *Nat*  
900 *Commun* 2016; **7**.
- 901 100. Miyauchi S, Navarro D, Grisel S, Chevret D, Berrin J-G, Rosso M-N. The integrative omics  
902 of white-rot fungus *Pycnoporus coccineus* reveals co-regulated CAZymes for orchestrated  
903 lignocellulose breakdown. *PLOS ONE* 2017; **12**: e0175528.
- 904 101. Campbell WG. The chemistry of the white rots of wood. *Biochem J* 1932; **26**: 1829–1838.
- 905 102. Almási É, Sahu N, Krizsán K, Bálint B, Kovács GM, Kiss B, et al. Comparative genomics  
906 reveals unique wood-decay strategies and fruiting body development in the  
907 Schizophyllaceae. *New Phytol* 2019; **224**: 902–915.
- 908 103. Daniel G, Volc J, Nilsson T. Soft rot and multiple T-branching by the basidiomycete  
909 *Oudemansiella mucida*. *Mycol Res* 1992; **96**: 49–54.
- 910 104. Schwarze FW, Fink S. Host and cell type affect the mode of degradation by *Meripilus*  
911 *giganteus*. *New Phytol* 1998; **139**: 721–731.
- 912 105. Moloney NM, Owens RA, Meleady P, Henry M, Dolan SK, Mulvihill E, et al. The iron-  
913 responsive microsomal proteome of *Aspergillus fumigatus*. *J Proteomics* 2016; **136**: 99–  
914 111.
- 915 106. Collins BC, Hunter CL, Liu Y, Schilling B, Rosenberger G, Bader SL, et al. Multi-laboratory  
916 assessment of reproducibility, qualitative and quantitative performance of SWATH-mass  
917 spectrometry. *Nat Commun* 2017; **8**.

- 918 107. Cox J, Hein MY, Luber CA, Paron I, Nagaraj N, Mann M. Accurate Proteome-wide Label-  
919 free Quantification by Delayed Normalization and Maximal Peptide Ratio Extraction,  
920 Termed MaxLFQ. *Mol Cell Proteomics* 2014; **13**: 2513–2526.
- 921 108. Robinson MD, McCarthy DJ, Smyth GK. edgeR: a Bioconductor package for differential  
922 expression analysis of digital gene expression data. *Bioinforma Oxf Engl* 2010; **26**: 139–  
923 140.
- 924 109. Robinson MD, Oshlack A. A scaling normalization method for differential expression  
925 analysis of RNA-seq data. *Genome Biol* 2010; **11**: R25.
- 926 110. Ritchie ME, Phipson B, Wu D, Hu Y, Law CW, Shi W, et al. limma powers differential  
927 expression analyses for RNA-sequencing and microarray studies. *Nucleic Acids Res* 2015;  
928 **43**: e47–e47.
- 929 111. Tyanova S, Temu T, Sinitcyn P, Carlson A, Hein MY, Geiger T, et al. The Perseus  
930 computational platform for comprehensive analysis of (prote)omics data. *Nat Methods*  
931 2016; **13**: 731–740.
- 932 112. Jones P, Binns D, Chang H-Y, Fraser M, Li W, McAnulla C, et al. InterProScan 5: genome-  
933 scale protein function classification. *Bioinformatics* 2014; **30**: 1236–1240.
- 934 113. Alexa A, Rahenfuhrer J. topGO: Enrichment Analysis for Gene Ontology. 2016.
- 935 114. Almagro Armenteros JJ, Sønderby CK, Sønderby SK, Nielsen H, Winther O. DeepLoc:  
936 prediction of protein subcellular localization using deep learning. *Bioinformatics* 2017; **33**:  
937 3387–3395.
- 938  
939

## 940 Supplementary Figures

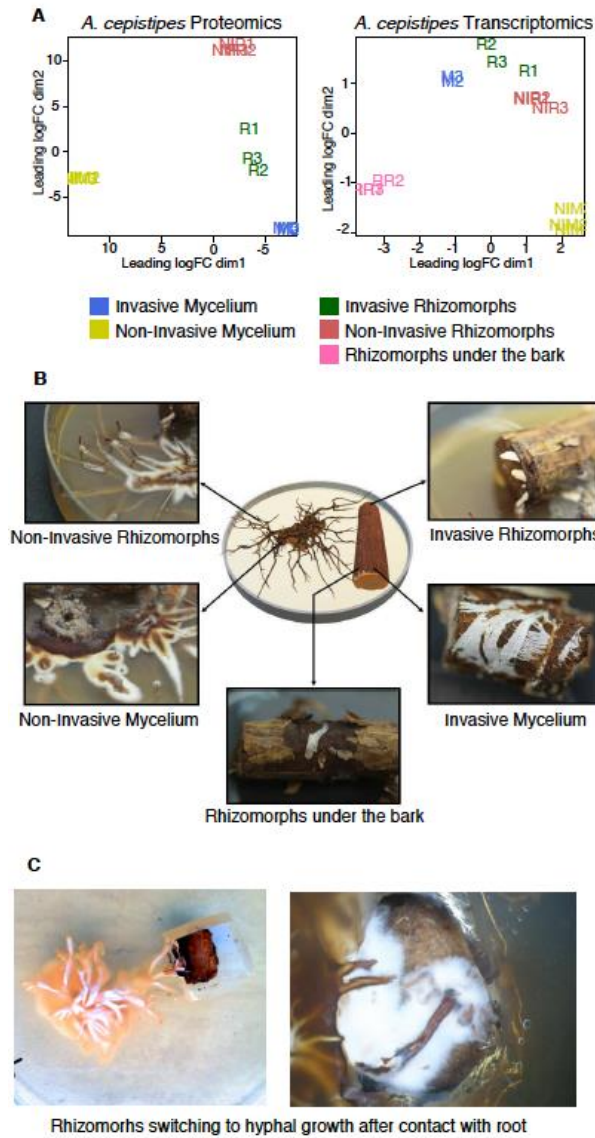

941

942 Fig S1. Experimental setup. A) Multidimensional scaling of three biological replicates from each  
943 of the tissue types in *A. cepistipes* for proteomics (left) and transcriptomics (right). B) The four  
944 tissue types sampled for transcriptomics and proteomics analysis viz. invasive mycelium  
945 (growing beneath the outer layer of the root), invasive rhizomorphs (emerging out of the roots),  
946 non-invasive mycelium and non-invasive rhizomorphs (growing in absence of root), along with  
947 additional RR (rhizomorphs growing beneath the outer layer of the root) in *A. cepistipes*. C)  
948 Pictures showing rhizomorphs differentiating into hyphae in contact with the spruce root.



### LogFC for 113 common proteins in Transcriptomics and Proteomics for MvsNIM - *Armillaria ostoyae*

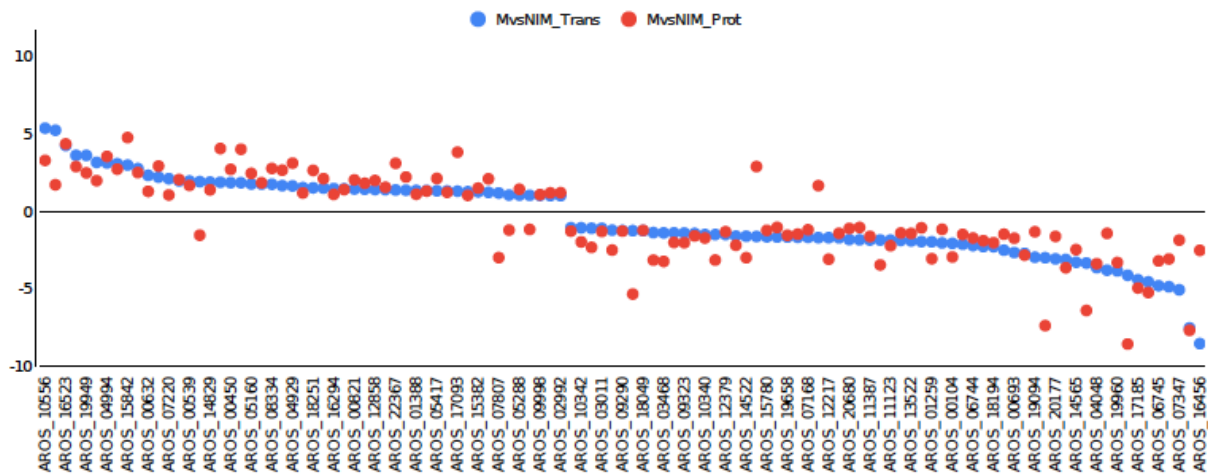

### LogFC for 161 common proteins in Transcriptomics and Proteomics for MvsNIM - *Armillaria cepitipes*

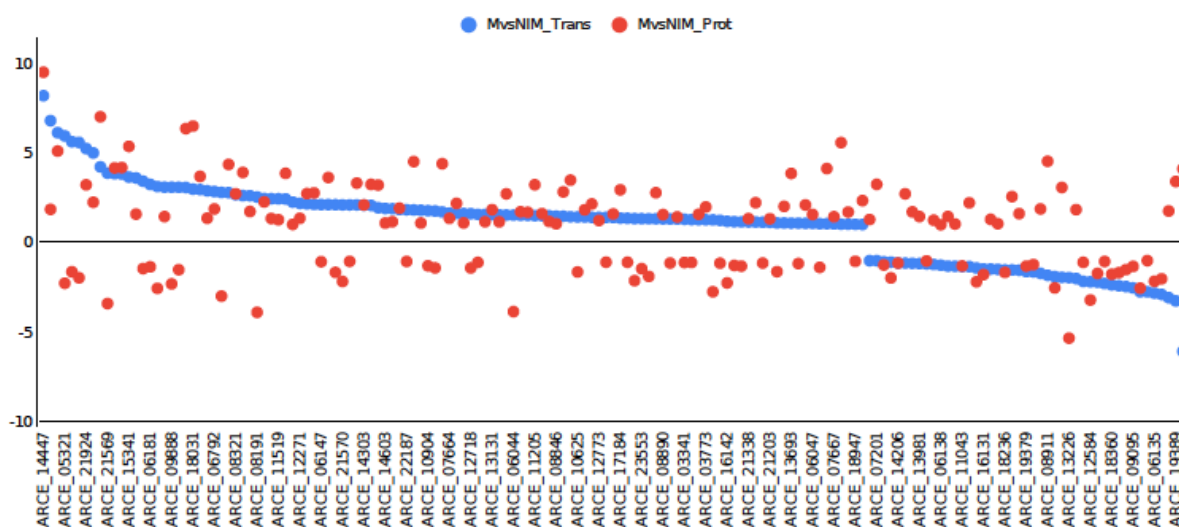

949

950 Fig S2. Log fold changes in MvsNIM of genes identified in both transcriptomics and proteomics  
951 data in *A. ostoyae* (top) and *A. cepitipes* (bottom). The logFC for transcripts (blue) are  
952 arranged from increased to decreasing order, overlaid with logFC from proteomics (red) shows  
953 a limited correlation between the two omics approaches.

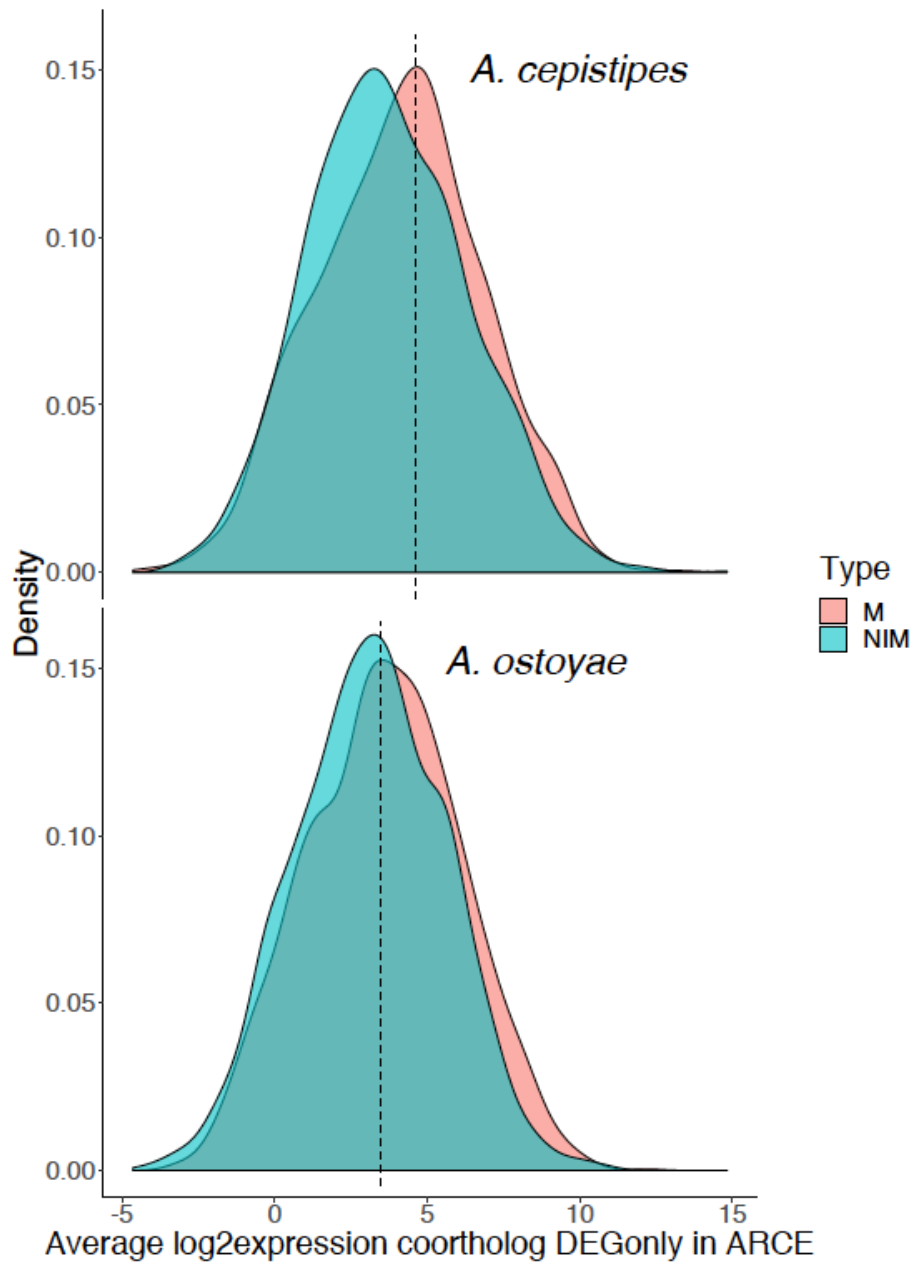

954

955 Fig S3. Distribution of raw expression values in both species for co-orthologs differentially  
956 expressed in MvsNIM of *A. cepistipes*. Baseline expression of genes in non-invasive mycelia of  
957 *A. ostoyae* was not higher than that in *A. cepistipes*, indicating a stronger response of *A.*  
958 *cepistipes*.

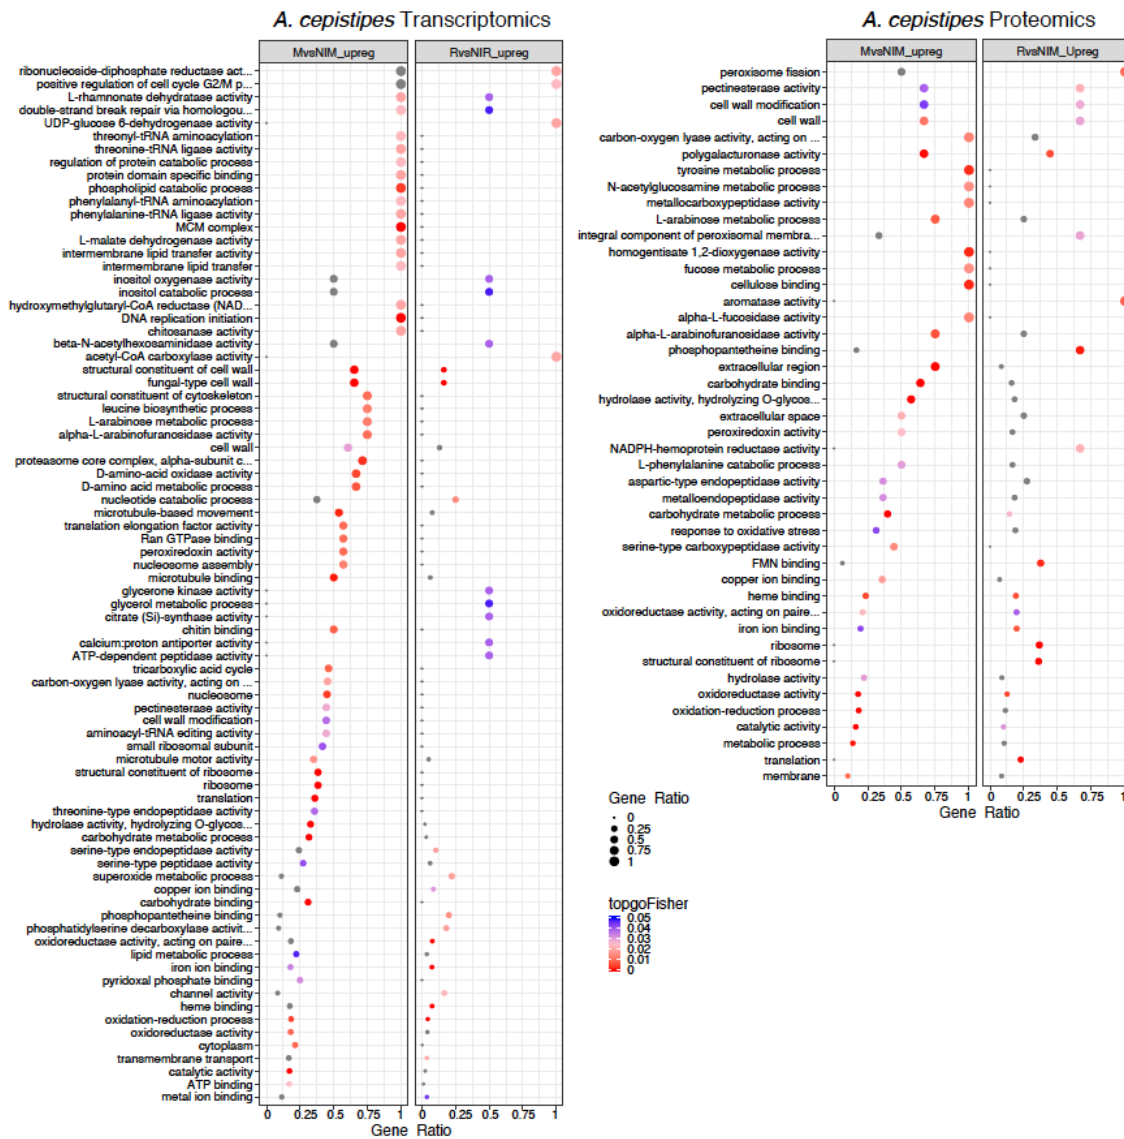

959

960 Fig S4. Enriched GO terms in MvsNIM and RvsNIR of *A. cepistipes* for transcriptomics (left) and  
 961 proteomics (right). The ratio of number of a particular GO term in a specific comparison  
 962 (mycelium vs non-invasive mycelium or in rhizomorphs vs non-invasive rhizomorphs) to the total  
 963 number of that GO term for a species was used to plot gene ratios for enriched GO terms  
 964 ( $p < 0.05$ , Fisher's exact test). The size of the dot is directly proportional to gene ratio, and the  
 965 color of the dots corresponds to p-values. Grey dots represent GO terms, enriched in only one  
 966 of the comparisons *i.e.* either mycelium vs non-invasive mycelium or rhizomorphs vs non-  
 967 invasive rhizomorphs.

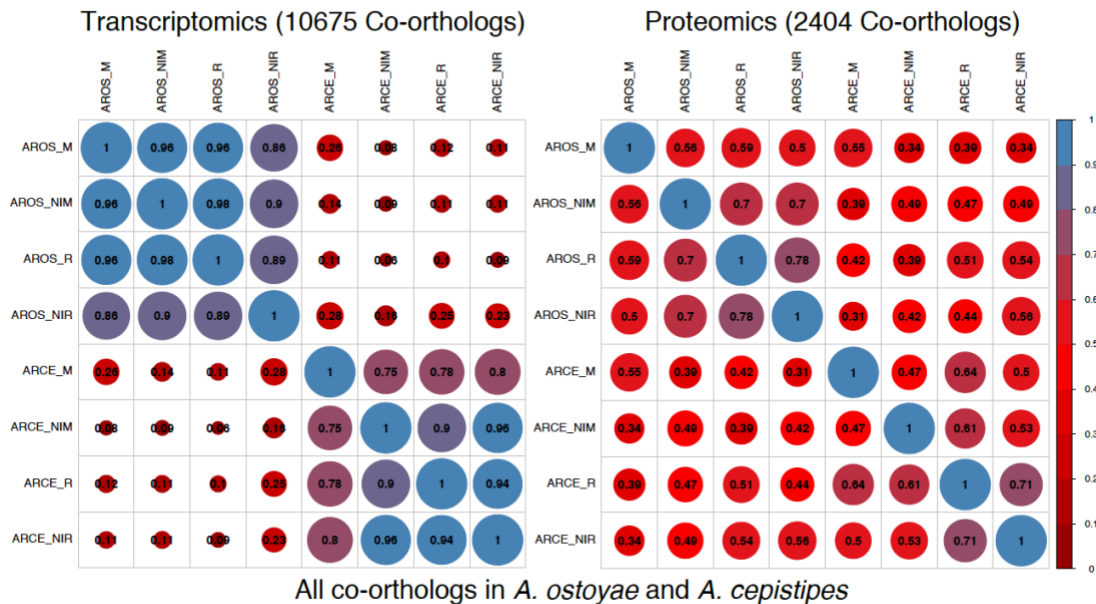

968

969 Fig S5. Correlogram for all co-orthologs in the two species, showing correlation between  
 970 samples across the two species. Blue represents a higher correlation and red represents lower.  
 971 The size of the circle is directly proportional to a higher correlation. Pairwise mean Pearson  
 972 correlation coefficients are indicated as numbers in the circles.

973

## 974 Supplementary Tables

975 Table S1. RNA-Seq mapping statistics for *A. ostoyae* and *A. cepistipes*

976

977 Table S2. Differentially expressed genes (RNA-Seq) in *A. ostoyae* and *A. cepistipes*

978

979 Table S3. Differentially abundant proteins (Proteomics) in *A. ostoyae* and *A. cepistipes*

980

981 Table S4. List of enriched GO terms in *A. ostoyae* and *A. cepistipes* in the transcriptomics and  
 982 proteomics analyses

983

984 Table S5. Single copy co-orthologs in both species, with common and species-specific  
 985 DEGs/DAPs in *A. ostoyae* and *A. cepistipes*

986

987 Table S6. Carbohydrate-active enzymes (CAZymes) and plant cell wall degrading enzymes  
 988 (PCWDEs) identified in transcriptomics and proteomics analyses of *A. ostoyae* and *A.*  
 989 *cepistipes*

990

991 Table S7. Putative transporters identified in transcriptomics and proteomics analyses of *A.*  
992 *ostoyae* and *A. cepistipes*
